# Supplementary material
Source: Research Square preprint supplement (doi:10.21203/rs.3.rs-9066772/v1)
Supplement: Supplementary file 1 [file 176ef57661dc5672c72ef49d.docx]

**Supplementary Material S1: Validated Study Instruments**

Algorithms of Aggression: A Mediational Analysis of Social Media Consumption,

Masculine Norms, and Rape Myth Acceptance Among Nigerian Male Undergraduates

**OVERVIEW OF INSTRUMENTS**

This supplementary document provides the full text of the three validated instruments used in this study, including all adapted items and response scales. The instruments are presented in the order of administration. Item-level subscale assignments are indicated in brackets following each item to facilitate replication and secondary analysis.

Three instruments were administered: (1) Social Media Intensity Scale-Adapted (SMIS-A; adapted from Ellison et al., 2007), a 15-item scale measuring intensity of engagement with gender-antagonistic social media content; (2) Conformity to Masculine Norms Inventory-22 (CMNI-22; Parent and Moradi, 2009), a 22-item measure of adherence to dominant masculine norms; and (3) Illinois Rape Myth Acceptance Scale-Short Form (IRMA-SF; McMahon and Farmer, 2011), a 20-item measure of rape myth endorsement.

**INSTRUMENT 1: SOCIAL MEDIA INTENSITY SCALE-ADAPTED (SMIS-A)**

***Instrument Information***

| Property | Details |
| --- | --- |
| Original Scale | Social Media Intensity Scale (Ellison et al., 2007) |
| Adaptation | Current authors, 2023 (expert panel + cognitive interviews) |
| Number of Items | 15 |
| Response Scale | 5-point frequency scale (1 = Never to 5 = Several times daily) |
| Scoring | Sum all 15 items; range 15-75; higher scores = greater intensity |
| Reliability (current sample) | Cronbach's alpha = .88 |
| Factor Structure | Unidimensional (eigenvalue = 6.81; 45.4% variance explained) |
| Subscales | General Use, Gender Content Seeking, Gender War Exposure, Engagement, Influencer Exposure, Community Participation, Motivation, Algorithmic Exposure, Cultivation, Attitude Formation (informational only; total score used in analyses) |

***Instructions to Participants***

The following questions ask about your use of social media platforms, particularly your engagement with content related to gender roles and relationships. There are no right or wrong answers. Please answer honestly based on your typical behaviour over the past three months. All responses are completely anonymous.

***Response Scale***

1 = Never 2 = Rarely 3 = Sometimes 4 = Often 5 = Several times daily

***Items***

**1.** How many hours per day do you spend on social media platforms (X/Twitter, TikTok, Instagram, Facebook)? *[General Use]*

**2.** How often do you actively seek out content related to gender debates or conflicts on social media? *[Gender Content Seeking]*

**3.** How frequently do you encounter posts or videos that depict men and women as adversaries or in conflict? *[Gender War Exposure]*

**4.** How often do you engage with (like, share, comment on) content that portrays women negatively or as inferior to men? *[Engagement]*

**5.** How often do you follow content creators or influencers who discuss men's rights or criticize feminism? *[Influencer Exposure]*

**6.** How frequently do you watch or read content describing women's behaviour as manipulative or deceptive? *[Gender War Exposure]*

**7.** How often do you participate in online groups or forums that discuss relationships from a male-dominant perspective? *[Community Participation]*

**8.** How frequently do you share content that you believe exposes the 'true nature' of women? *[Engagement]*

**9.** How often do you use social media to find validation for your views about gender roles? *[Motivation]*

**10.** How frequently does the content in your social media feed reinforce the idea that men are naturally dominant? *[Algorithmic Exposure]*

**11.** How often do you encounter and engage with 'Red Pill' or similar ideological content online? *[Red Pill Exposure]*

**12.** How frequently do you notice that social media algorithms recommend increasingly extreme gender-related content to you? *[Algorithmic Exposure]*

**13.** How often do you feel that social media content accurately describes gender relations in Nigeria? *[Cultivation]*

**14.** How frequently do you consume content that frames legal protections for women (e.g., VAPP Act) as unfair to men? *[Gender War Exposure]*

**15.** How often does consuming gender-related social media content influence how you think about relationships with women? *[Attitude Formation]*

**INSTRUMENT 2: CONFORMITY TO MASCULINE NORMS INVENTORY-22 (CMNI-22)**

***Instrument Information***

| Property | Details |
| --- | --- |
| Original Scale | CMNI-22 (Parent and Moradi, 2009) |
| Adaptation | Back-translation verification only (no content changes) |
| Number of Items | 22 (11 subscale items used in this study: Power Over Women = 6; Dominance = 4; Violence = 3; note: item numbering follows full CMNI-22) |
| Response Scale | 4-point Likert scale (0 = Strongly disagree to 3 = Strongly agree) |
| Scoring | Mean subscale scores used; R = reverse-scored item; higher scores = greater conformity |
| Reliability (Power Over Women) | Cronbach's alpha = .84 |
| Reliability (Dominance) | Cronbach's alpha = .79 |
| Reliability (Violence) | Cronbach's alpha = .81 |
| Reference | Parent, M. C., and Moradi, B. (2009). Psychology of Men and Masculinity, 10(3), 175-189. https://doi.org/10.1037/a0016631 |

***Instructions to Participants***

The following statements describe different attitudes and behaviours. Please indicate the extent to which you agree or disagree with each statement as it applies to you personally. There are no right or wrong answers. Please be as honest as possible.

***Response Scale***

0 = Strongly disagree 1 = Disagree 2 = Agree 3 = Strongly agree

***Items***

**1.** I would be furious if someone thought I was gay. *[Power Over Women]*

**2.** I believe a husband should not have to do household chores. *[Power Over Women]*

**3.** I think a man should never back down from a fight. *[Dominance]*

**4.** I think a man's wife or girlfriend should treat him like a king. *[Power Over Women]*

**5.** I think men should be physically strong. *[Dominance]*

**6.** I dominate women I am in relationships with. *[Power Over Women]*

**7.** I do not need help from anyone. *[Self-reliance]*

**8.** I feel that women who flirt are asking for trouble. *[Power Over Women]*

**9.** In general, I will do anything to win. *[Dominance]*

**10.** I tend to share my feelings. *[Self-reliance - R]*

**11.** I have no problem being in charge of others. *[Dominance]*

**12.** I feel comfortable asking for help when I need it. *[Self-reliance - R]*

**13.** I would feel terrible if I thought I came across as feminine. *[Power Over Women]*

**14.** I prefer to treat women with respect. *[Power Over Women - R]*

**15.** The welfare of my family is my number one concern. *[Family]*

**16.** I believe it is important to take risks. *[Risk-taking]*

**17.** I seek medical attention when I think something is wrong with me. *[Self-reliance - R]*

**18.** Violence is almost never justified. *[Violence - R]*

**19.** I enjoy taking risks. *[Risk-taking]*

**20.** Men who ask for help are weak. *[Self-reliance]*

**21.** A man's first priority should be to control his life. *[Dominance]*

**22.** I have hit a man before. *[Violence]*

**INSTRUMENT 3: ILLINOIS RAPE MYTH ACCEPTANCE SCALE-SHORT FORM (IRMA-SF)**

***Instrument Information***

| Property | Details |
| --- | --- |
| Original Scale | IRMA-SF (McMahon and Farmer, 2011) |
| Adaptation | Minor phrasing adjustments to 2 items; verified through focus groups (N = 24) |
| Number of Items | 20 |
| Subscales | She Asked for It (7 items); She Lied (5 items); He Didn't Mean To (4 items); It Wasn't Really Rape (6 items) -- note: 2 items load on multiple subscales; individual item subscale assignments follow original scale |
| Response Scale | 5-point Likert scale (1 = Strongly disagree to 5 = Strongly agree) |
| Scoring | Mean of all 20 items; higher scores = greater rape myth acceptance; no reverse scoring |
| Reliability (current sample) | Cronbach's alpha = .85 |
| Factor Structure | Four-factor structure confirmed (CFI = .96, RMSEA = .048) |
| Reference | McMahon, S., and Farmer, G. L. (2011). Social Work Research, 35(2), 71-81. https://doi.org/10.1093/swr/35.2.71 |
| Cultural Adaptation Note | Items 3 and 16 received minor phrasing adjustments to improve naturalness in Nigerian English. Original wording is preserved in brackets below each adapted item. |

***Instructions to Participants***

The following statements reflect opinions that some people hold. Please read each statement carefully and indicate the extent to which you personally agree or disagree. Remember, there are no right or wrong answers. Please answer based on your own genuine opinion.

***Response Scale***

1 = Strongly disagree 2 = Disagree 3 = Neutral 4 = Agree 5 = Strongly agree

***Items***

**1.** If a girl is raped while she is drunk, she is at least somewhat responsible for letting things get out of hand. *[She Asked for It]*

**2.** When girls get raped, they are often wearing seductive clothes. *[She Asked for It]*

**3.** If a girl doesn't physically fight back, you can't really say it was rape. *[It Wasn't Really Rape]*

**4.** A lot of women lead men on and then claim rape. *[She Lied]*

**5.** Rape accusations are often used as a way of getting back at men. *[She Lied]*

**6.** More than half of all rape reports are false. *[She Lied]*

**7.** When men rape, it is because of their strong desire for sex. *[He Didn't Mean To]*

**8.** If a woman is willing to make out with a guy, she shouldn't be surprised if he tries to force sex. *[She Asked for It]*

**9.** It is not rape if the guy is drunk. *[He Didn't Mean To]*

**10.** If the rapist doesn't have a weapon, you really can't call it rape. *[It Wasn't Really Rape]*

**11.** Women who claim to be raped should be required to prove they did not flirt first. *[She Asked for It]*

**12.** A man wouldn't rape a woman unless he was intoxicated. *[He Didn't Mean To]*

**13.** Any healthy woman can resist a rapist if she really wants to. *[It Wasn't Really Rape]*

**14.** A rape probably didn't happen if the woman has no bruises or marks. *[It Wasn't Really Rape]*

**15.** If a girl initiates kissing or making out, she should not be surprised if a guy assumes she wants to have sex. *[She Asked for It]*

**16.** When women are raped, it's often because the way they said 'no' was unclear. *[It Wasn't Really Rape]*

**17.** Rape happens when a man's sex drive goes out of control. *[He Didn't Mean To]*

**18.** Rape is unlikely to happen in a woman's own neighborhood. *[It Wasn't Really Rape]*

**19.** A lot of times, women who say they were raped agreed to have sex and then regret it. *[She Lied]*

**20.** If a woman says 'yes' to sex and then changes her mind, she can't claim rape if the man continues. *[She Lied]*

**SCORING AND INTERPRETATION GUIDE**

***SMIS-A Total Score***

Sum all 15 items. Range: 15-75. Higher scores indicate greater intensity of engagement with gender-antagonistic social media content. Suggested tertile cut-points for descriptive purposes: Low (15-35), Moderate (36-55), High (56-75).

***CMNI-22 Subscale Scores***

Power Over Women (items 1, 2, 4, 6, 8, 13, 14R): Compute mean of 7 items after reverse-scoring item 14. Range: 0-3. Higher scores = greater endorsement of male dominance over women.

Dominance (items 3, 5, 9, 11, 21): Compute mean of 5 items. Range: 0-3. Higher scores = greater endorsement of dominance norms.

Violence (items 18R, 22): Compute mean of 2 items after reverse-scoring item 18. Range: 0-3. Higher scores = greater endorsement of violence as masculine expression. Note: subscale composition may vary across validation studies; refer to Parent and Moradi (2009) for full psychometric detail.

***IRMA-SF Total Score***

Compute mean of all 20 items. Range: 1-5. Higher scores indicate greater acceptance of rape myths. Subscale scores can be computed by averaging items within each subscale as indicated in item listings above.

**REFERENCES**

Ellison, N. B., Steinfield, C., and Lampe, C. (2007). The benefits of Facebook 'friends': Social capital and college students' use of online social network sites. Journal of Computer-Mediated Communication, 12(4), 1143-1168. https://doi.org/10.1111/j.1083-6101.2007.00367.x

McMahon, S., and Farmer, G. L. (2011). An updated measure for assessing subtle rape myths. Social Work Research, 35(2), 71-81. https://doi.org/10.1093/swr/35.2.71

Parent, M. C., and Moradi, B. (2009). Confirmatory factor analysis of the Conformity to Masculine Norms Inventory and development of the CMNI-22. Psychology of Men and Masculinity, 10(3), 175-189. https://doi.org/10.1037/a0016631
