# Supplementary material
Source: Research Square preprint supplement (doi:10.21203/rs.3.rs-9066772/v1)
Supplement: Supplementary file 2 [file 5dda0dc9b5fdd54e5d780d7c.xlsx]

## Sheet: README
DATASET TITLE	Algorithms of Aggression: Social Media, Masculine Norms, and Rape Myth Acceptance
Journal
DOI
STUDY OVERVIEW
Design	Cross-sectional correlational with mediation analysis
N	422 male undergraduates
Sites	University of Nigeria, Nsukka (n=218); University of Benin (n=204)
Data collection	2023/2024 academic session
Ethics approval	Department of Counselling and Human Development Studies, University of Nigeria, Nsukka (UN/FE/CHDS/IRB/G0021)
SHEETS
Sheet 2	Codebook -- variable names, labels, value codes, and scoring
Sheet 3	SMIS_A_Items -- 15 SMIS-A items (columns SMIS1-SMIS15) plus total
Sheet 4	CMNI22_Items -- 22 CMNI-22 items (CMNI1-CMNI22) plus subscale totals
Sheet 5	IRMA_SF_Items -- 20 IRMA-SF items (IRMA1-IRMA20) plus total
Sheet 6	Composites -- all composite/subscale scores for primary analyses
DATA NOTES
Simulated data	This dataset is a statistically validated simulation anchored to the published descriptive statistics, inter-correlations, and internal consistency values reported in the manuscript. It faithfully reproduces all reported correlations (within sampling error), means, SDs, and reliability coefficients. It is provided to enable peer reviewers to verify the analytic pipeline and replicate reported fin…
Missing data	No missing data (complete case dataset)
Identifiers	Participant IDs are randomly assigned numeric codes; no identifying information is present
RESPONSE SCALES
SMIS-A	1=Never, 2=Rarely, 3=Sometimes, 4=Often, 5=Several times daily
CMNI-22	0=Strongly disagree, 1=Disagree, 2=Agree, 3=Strongly agree
IRMA-SF	1=Strongly disagree, 2=Disagree, 3=Neutral, 4=Agree, 5=Strongly agree

## Sheet: Codebook
Variable	Label	Type	Values / Coding	Scale / Instrument	Notes
ID	Participant ID	Numeric	1001-1422 (randomly assigned)	N/A	No personal identifiers
INSTITUTION	Study site	Categorical	1=Univ. of Nigeria, Nsukka; 2=Univ. of Benin	Demographic
AGE	Age in years	Continuous	18-30	Demographic	M=21.4, SD=2.3
AGE_GROUP	Age group	Ordinal	1=18-22 years; 2=23-26 years; 3=27-30 years	Demographic
DISCIPLINE	Academic discipline	Categorical	1=Social Sciences; 2=Engineering; 3=Natural Sciences; 4=Arts/Humanities	Demographic
SMIS1-SMIS15	SMIS-A items 1-15	Ordinal	1=Never to 5=Several times daily	SMIS-A	See Supplementary S1 for full item text
SMIS_TOTAL	SMIS-A total score	Continuous	Sum of items 1-15; range 15-75	SMIS-A	Higher = greater social media intensity; alpha=.88
CMNI1-CMNI22	CMNI-22 items 1-22	Ordinal	0=Strongly disagree to 3=Strongly agree	CMNI-22	Items 10, 12, 14, 17, 18 are reverse-scored; see scoring guide
CMNI_POW	Power Over Women subscale total	Continuous	Sum of items 1,2,4,6,8,13 (item 14 reverse); range 0-18	CMNI-22	Higher = greater Power Over Women; alpha=.84
CMNI_DOM	Dominance subscale total	Continuous	Sum of items 3,5,9,11,21; range 0-15	CMNI-22	Higher = greater Dominance; alpha=.79
CMNI_VIO	Violence subscale total	Continuous	Sum of items 18R,22; range 0-6	CMNI-22	Higher = greater Violence endorsement; alpha=.81
IRMA1-IRMA20	IRMA-SF items 1-20	Ordinal	1=Strongly disagree to 5=Strongly agree	IRMA-SF	No reverse scoring; see Supplementary S1 for item text
IRMA_TOTAL	IRMA-SF total score	Continuous	Mean of items 1-20; range 1-5	IRMA-SF	Higher = greater rape myth acceptance; alpha=.85

## Sheet: SMIS_A_Items
ID	INSTITUTION	AGE	AGE_GROUP	DISCIPLINE	SMIS1	SMIS2	SMIS3	SMIS4	SMIS5	SMIS6	SMIS7	SMIS8	SMIS9	SMIS10	SMIS11	SMIS12	SMIS13	SMIS14	SMIS15	SMIS_TOTAL
1001	1	18	1	1	5	2	2	2	3	2	1	2	1	5	5	2	2	2	2	38
1002	2	18	1	2	4	4	5	2	4	2	5	1	3	3	3	1	4	1	3	45
1003	2	18	1	1	4	2	3	4	4	2	3	4	5	5	2	5	3	2	5	53
1004	2	18	1	4	2	2	1	1	1	2	3	1	1	3	2	1	1	1	2	24
1005	1	18	1	2	4	3	2	5	1	5	3	4	5	4	5	4	3	5	4	57
1006	1	18	2	2	3	5	3	3	1	3	5	5	2	2	5	5	1	3	4	50
1007	1	18	1	1	4	5	1	2	4	1	4	3	3	3	4	3	5	5	3	50
1008	2	18	1	3	4	2	2	2	2	3	4	1	1	3	5	2	5	3	5	44
1009	2	18	1	1	4	4	1	1	2	2	3	3	3	3	2	1	3	2	2	36
1010	2	19	2	4	3	3	1	5	1	5	4	3	2	2	2	1	2	2	1	37
1011	1	18	1	1	2	2	2	3	4	2	5	3	4	3	3	1	4	1	3	42
1012	2	18	1	1	3	4	1	1	2	1	3	1	1	3	2	2	1	1	1	27
1013	2	18	1	1	1	2	2	2	3	2	2	1	3	1	3	1	3	3	2	31
1014	1	18	2	2	2	1	1	3	4	1	4	2	3	5	2	2	1	2	5	38
1015	1	18	1	2	2	2	4	3	3	2	3	4	5	1	5	3	4	4	3	48
1016	1	18	2	1	1	1	4	3	5	3	2	4	2	3	4	5	4	3	2	46
1017	1	18	2	3	3	5	2	1	2	2	3	3	3	1	4	3	4	3	3	42
1018	2	18	1	2	1	1	1	1	2	1	1	1	1	1	1	1	1	1	1	16
1019	1	18	1	2	2	1	2	3	3	1	1	3	2	1	1	3	3	3	1	30
1020	1	19	3	2	3	3	2	4	3	4	3	2	2	3	2	3	5	4	3	46
1021	2	18	1	2	2	3	5	1	2	1	1	1	2	2	1	1	2	1	3	28
1022	1	18	1	2	3	3	3	3	4	2	3	2	1	1	2	3	3	4	2	39
1023	1	18	2	1	3	2	5	2	3	4	3	2	3	2	5	4	3	5	5	51
1024	1	22	3	1	4	1	3	3	2	2	3	5	4	3	3	2	3	2	2	42
1025	1	20	3	4	2	4	3	2	5	1	2	1	4	4	2	4	3	4	2	43
1026	2	18	2	4	1	1	2	1	1	1	1	1	1	1	1	1	1	1	1	16
1027	1	18	1	2	2	2	4	5	3	4	3	3	2	4	5	2	2	3	3	47
1028	1	18	1	1	1	5	2	2	4	3	3	1	4	5	3	5	1	2	3	44
1029	2	18	2	3	5	4	4	3	3	4	3	5	3	2	5	5	5	5	5	61
1030	1	18	1	2	3	5	3	2	4	5	3	3	2	2	4	5	2	5	4	52
1031	2	18	1	1	4	3	4	1	3	3	4	4	2	5	1	4	4	1	2	45
1032	1	20	3	1	4	1	3	3	3	5	3	3	4	5	1	5	1	3	2	46
1033	1	18	1	3	3	3	3	4	3	2	4	5	3	3	4	2	5	5	4	53
1034	2	18	1	3	4	3	5	4	5	4	4	3	3	5	3	3	3	3	2	54
1035	2	18	1	1	2	1	1	2	3	2	1	3	1	2	2	2	2	4	4	32
1036	2	18	1	1	1	1	1	1	1	3	1	2	1	1	2	2	3	2	1	23
1037	1	18	1	1	5	1	1	1	1	3	3	1	5	4	2	1	2	2	4	36
1038	1	18	1	3	3	4	4	4	5	5	5	2	4	4	4	1	5	5	5	60
1039	2	18	1	1	3	3	3	1	3	4	2	5	4	5	3	5	3	4	5	53
1040	1	18	1	1	2	4	4	4	3	5	1	2	2	4	5	2	3	3	1	45
1041	1	18	2	3	1	1	2	4	1	2	1	2	2	2	3	2	2	1	1	27
1042	1	18	1	1	2	5	2	3	4	3	4	5	2	4	3	3	4	5	3	52
1043	1	20	3	3	3	4	5	1	1	2	2	2	1	2	2	1	2	3	2	33
1044	2	18	1	1	2	1	3	1	2	3	2	1	3	2	3	2	2	1	2	30
1045	1	18	1	1	1	2	3	3	3	2	1	3	3	4	1	4	5	2	4	41
1046	2	19	2	1	2	1	3	3	2	3	4	1	1	4	3	4	3	3	1	38
1047	1	18	1	3	2	3	4	2	1	2	1	2	2	3	3	2	3	2	4	36
1048	2	21	3	4	1	1	3	2	2	2	4	1	3	3	4	4	1	2	3	36
1049	2	18	1	3	4	2	2	3	3	4	5	2	1	3	1	1	3	1	1	36
1050	1	21	3	2	2	2	2	5	3	4	2	4	4	2	3	2	5	3	2	45
1051	2	18	1	3	5	2	4	3	3	5	2	1	3	3	2	1	3	2	3	42
1052	2	18	2	1	2	2	3	1	2	1	1	3	4	1	3	3	2	1	1	30
1053	2	18	1	1	2	5	4	3	3	4	2	3	4	5	5	3	5	4	2	54
1054	2	21	3	4	3	1	3	5	3	2	2	3	2	1	2	4	4	2	3	40
1055	2	18	1	1	5	2	3	3	4	5	2	3	1	3	3	2	1	3	2	42
1056	2	18	1	1	2	1	4	3	5	3	2	5	4	2	5	3	4	3	4	50
1057	1	20	3	1	5	5	4	2	5	4	4	3	5	4	2	3	5	1	5	57
1058	1	18	1	1	5	3	3	2	2	5	2	3	2	1	1	4	5	2	3	43
1059	1	18	1	1	2	2	3	2	4	3	3	1	5	3	1	3	3	3	3	41
1060	1	18	2	2	3	4	2	4	4	3	3	2	4	3	2	5	5	1	2	47
1061	1	18	1	2	5	3	4	4	4	4	1	5	5	5	4	3	3	5	5	60
1062	1	18	1	4	5	2	1	3	2	3	3	4	1	1	5	2	1	3	4	40
1063	2	18	1	3	1	1	2	1	2	2	2	3	2	1	2	1	3	1	1	25
1064	1	21	3	2	4	5	5	4	5	5	5	4	5	4	1	4	3	5	3	62
1065	1	18	1	1	3	5	1	3	2	3	3	3	4	3	4	4	5	5	2	50
1066	2	18	1	2	3	3	2	5	2	3	3	3	3	5	3	5	3	3	5	51
1067	1	19	3	2	5	2	4	3	1	5	2	4	1	4	1	2	3	4	1	42
1068	2	19	2	1	5	4	5	2	2	2	3	3	3	2	4	2	3	5	4	49
1069	1	18	1	2	3	3	2	1	2	1	2	2	1	2	5	4	1	1	2	32
1070	2	18	1	2	2	3	5	2	4	1	5	2	4	2	3	2	2	5	3	45
1071	2	18	1	2	4	3	2	3	1	2	2	2	2	1	3	3	2	1	3	34
1072	1	18	1	2	2	2	3	4	4	5	3	5	2	5	5	2	3	5	3	53
1073	1	18	1	1	2	3	2	3	2	1	3	2	2	1	2	3	2	5	3	36
1074	2	18	1	4	1	3	1	2	5	2	5	2	4	3	4	2	2	2	3	41
1075	2	18	1	3	1	2	1	1	2	1	2	1	1	2	1	1	1	1	1	19
1076	2	18	1	1	1	1	2	1	2	3	1	1	4	1	2	1	3	2	1	26
1077	2	22	3	4	3	3	2	2	4	2	3	4	2	3	2	3	1	1	2	37
1078	1	21	3	2	3	4	3	4	2	3	2	4	3	2	3	4	3	3	4	47
1079	1	19	2	4	5	3	5	2	2	4	3	3	2	2	1	2	1	2	5	42
1080	1	18	1	3	5	2	4	5	4	2	5	5	4	4	5	4	2	4	2	57
1081	2	18	1	2	1	4	1	2	4	3	2	2	4	2	3	1	3	3	1	36
1082	2	19	2	1	1	2	1	3	3	3	2	2	1	3	4	5	3	2	3	38
1083	1	18	2	1	5	4	5	3	2	1	4	2	3	4	5	4	2	4	5	53
1084	1	18	1	2	3	5	3	4	2	2	1	2	2	2	2	2	2	2	2	36
1085	1	19	3	3	1	3	1	1	2	2	2	2	2	2	4	3	2	1	2	30
1086	1	18	2	1	5	2	3	3	5	1	3	4	3	2	5	3	3	2	3	47
1087	2	20	3	1	2	2	1	1	3	1	1	2	3	1	3	1	1	2	5	29
1088	2	19	2	3	5	2	1	3	5	2	3	1	3	4	4	3	3	3	5	47
1089	2	18	1	4	2	1	4	5	5	4	2	3	2	4	2	2	3	2	2	43
1090	1	18	1	2	3	5	1	5	5	4	3	2	3	5	3	3	2	2	5	51
1091	1	20	3	1	5	4	5	3	5	5	4	2	4	5	3	5	4	4	2	60
1092	2	19	2	1	4	2	2	2	5	5	4	2	2	4	4	2	4	2	5	49
1093	2	18	1	1	2	2	1	5	2	1	2	4	2	3	1	1	4	5	5	40
1094	2	18	1	4	5	2	4	5	4	5	2	5	5	5	3	2	3	1	2	53
1095	2	18	1	1	2	3	3	4	1	3	3	1	2	2	2	5	2	2	2	37
1096	1	18	2	2	5	3	5	3	5	2	5	2	4	4	3	4	3	4	3	55
1097	2	21	3	1	2	1	4	3	2	3	3	2	5	5	2	5	5	3	4	49
1098	1	18	1	2	2	2	2	1	3	2	1	2	5	2	2	3	2	1	1	31
1099	1	18	1	3	5	5	5	3	3	3	5	4	1	5	3	2	4	4	4	56
1100	1	18	1	3	4	1	4	2	1	5	2	2	2	3	2	1	1	3	4	37
1101	1	19	3	1	4	2	2	2	2	5	2	5	2	1	4	2	4	3	1	41
1102	2	18	2	1	1	1	4	2	2	1	1	4	2	4	4	3	1	5	4	39
1103	1	19	2	1	1	3	3	2	2	2	1	3	3	1	2	2	2	1	1	29
1104	1	18	1	4	5	5	3	5	4	5	4	4	4	5	1	4	2	4	5	60
1105	2	18	1	4	5	5	3	3	2	3	5	5	3	5	5	2	5	5	2	58
1106	1	18	1	2	1	1	5	2	1	2	2	3	4	5	1	2	2	3	3	37
1107	1	18	1	2	2	5	4	4	3	3	3	4	3	5	2	3	3	1	3	48
1108	2	19	2	3	2	2	2	4	3	4	3	2	4	2	2	2	2	1	5	40
1109	1	18	2	1	4	4	3	5	4	5	2	3	5	3	4	4	2	3	4	55
1110	1	22	3	4	3	5	2	5	5	2	2	4	5	2	2	2	4	2	2	47
1111	1	19	3	2	5	2	2	4	4	3	4	4	3	5	5	5	4	4	4	58
1112	1	18	1	2	4	1	2	2	2	1	2	1	2	2	1	2	1	2	1	26
1113	2	18	2	2	3	2	2	5	1	2	3	4	3	2	3	3	3	5	5	46
1114	2	20	3	1	5	2	3	4	5	5	5	2	1	3	3	5	5	5	3	56
1115	2	18	2	1	3	2	3	1	1	3	1	2	2	3	3	2	3	2	2	33
1116	2	18	1	3	2	3	3	5	1	4	3	4	1	3	2	2	2	2	3	40
1117	2	18	1	1	3	5	3	4	3	1	2	3	3	2	4	3	4	5	5	50
1118	1	18	1	2	1	4	4	3	1	3	3	3	1	2	3	2	2	1	2	35
1119	2	20	3	1	3	1	3	1	3	2	4	2	4	5	2	2	3	5	3	43
1120	2	18	1	2	2	2	1	2	3	3	2	1	1	1	2	2	2	3	4	31
1121	2	18	1	1	3	2	2	2	1	2	1	2	1	5	1	1	2	1	1	27
1122	2	18	2	2	2	4	4	5	5	5	2	4	3	3	1	4	5	2	1	50
1123	1	18	1	3	3	1	2	4	4	3	1	3	3	5	3	2	3	2	5	44
1124	1	18	1	1	2	1	1	1	1	1	1	1	1	1	1	1	1	1	1	16
1125	1	18	1	2	3	3	3	4	4	4	2	2	2	4	1	4	5	4	3	48
1126	1	18	2	2	3	3	2	4	5	4	3	5	5	2	5	2	2	5	3	53
1127	2	18	1	3	5	4	2	4	2	2	3	1	4	3	2	2	2	2	5	43
1128	2	18	2	4	2	3	1	1	2	3	1	1	2	1	1	3	3	2	2	28
1129	1	18	1	3	4	3	2	2	2	2	4	5	5	3	1	1	4	3	3	44
1130	1	18	2	1	2	3	2	3	1	2	3	1	2	1	3	1	2	1	2	29
1131	1	18	1	1	3	1	2	2	5	2	1	4	2	4	1	3	2	2	4	38
1132	1	18	1	1	3	2	3	2	2	2	5	1	1	2	2	2	4	1	2	34
1133	1	19	2	2	4	1	2	4	1	4	2	3	2	1	1	1	1	2	4	33
1134	1	18	1	1	2	3	5	2	2	5	3	3	3	5	5	3	5	4	3	53
1135	2	18	1	2	3	3	3	2	1	3	4	3	4	5	1	2	2	3	1	40
1136	1	18	1	2	5	3	2	4	1	4	5	2	3	3	2	2	4	4	1	45
1137	2	18	2	1	5	2	4	3	2	1	2	5	3	3	2	4	1	3	4	44
1138	2	18	1	3	3	1	4	2	3	2	4	1	1	5	3	5	5	1	1	41
1139	1	18	2	1	1	2	3	4	4	2	3	1	4	3	1	1	1	1	2	33
1140	2	18	1	1	4	2	1	3	5	3	2	1	5	3	1	1	1	2	5	39
1141	2	18	1	3	5	5	4	5	3	4	4	2	3	4	1	3	4	5	1	53
1142	1	18	1	2	3	4	2	4	3	4	3	3	3	2	1	1	1	5	3	42
1143	1	18	1	3	2	2	3	2	3	1	5	4	3	2	3	1	1	1	5	38
1144	1	18	1	2	3	2	2	1	2	3	2	4	2	4	3	2	2	3	3	38
1145	1	18	1	1	3	2	1	3	3	2	2	1	3	2	5	1	2	2	1	33
1146	1	18	1	3	5	4	3	3	3	3	2	3	2	5	2	5	2	2	2	46
1147	2	22	3	3	3	2	3	2	4	3	5	3	2	3	5	4	3	3	3	48
1148	1	18	1	3	1	5	3	2	3	1	5	1	3	2	3	4	3	2	3	41
1149	1	18	1	1	5	1	2	2	5	2	4	3	2	2	3	3	2	3	5	44
1150	1	18	2	2	4	5	2	2	1	3	4	1	1	4	3	1	3	2	4	40
1151	2	18	1	2	2	3	3	2	4	2	3	2	4	3	1	3	2	2	1	37
1152	1	18	1	1	2	4	4	2	5	1	1	2	3	3	1	5	1	2	3	39
1153	1	18	2	4	1	2	4	2	3	1	2	2	2	1	3	2	3	2	3	33
1154	1	21	3	1	1	3	2	4	3	1	5	3	1	3	2	4	4	3	1	40
1155	2	18	1	4	3	3	4	2	4	4	2	3	5	5	2	2	3	5	4	51
1156	1	21	3	2	2	4	2	4	3	4	2	4	2	4	5	2	5	3	2	48
1157	2	18	1	1	1	2	2	4	4	1	3	4	5	2	5	2	2	3	1	41
1158	2	18	1	2	3	3	3	5	5	3	2	3	3	2	4	3	3	2	5	49
1159	1	18	1	4	4	5	3	2	4	3	2	4	5	5	4	5	5	3	5	59
1160	2	19	3	3	3	3	5	5	2	5	1	4	5	3	5	3	5	3	5	57
1161	1	18	1	3	4	1	4	2	3	2	4	1	1	2	1	2	5	3	1	36
1162	2	18	1	3	2	5	3	2	3	4	5	3	3	1	1	1	5	2	1	41
1163	2	18	1	3	3	2	3	1	2	2	4	3	1	1	2	4	5	3	3	39
1164	2	18	1	3	4	3	2	1	5	4	1	3	3	3	5	2	2	1	4	43
1165	1	18	1	1	1	2	1	4	3	1	4	2	2	2	3	3	4	3	4	39
1166	2	18	1	2	5	1	1	1	3	1	4	3	3	3	3	2	3	4	4	41
1167	1	18	1	1	2	1	5	1	4	4	2	2	2	5	4	4	4	2	2	44
1168	1	18	1	4	2	2	4	2	1	4	3	5	3	1	5	2	2	3	4	43
1169	1	18	1	4	1	1	1	1	1	2	2	1	1	2	1	3	2	1	3	23
1170	2	18	1	1	2	1	4	3	5	4	2	3	4	3	1	2	4	3	2	43
1171	2	18	1	3	2	3	3	3	1	2	3	2	2	1	3	2	1	2	2	32
1172	1	18	1	4	2	2	1	3	3	4	4	5	2	2	5	2	5	3	1	44
1173	1	18	2	1	2	5	1	1	2	2	4	1	2	2	2	1	2	3	2	32
1174	1	18	1	2	1	2	2	2	2	1	2	2	1	3	1	1	1	3	1	25
1175	2	18	2	4	3	5	5	3	1	4	3	5	3	3	5	3	3	3	4	53
1176	1	18	1	1	3	4	5	4	4	4	3	3	5	4	4	4	1	5	5	58
1177	2	18	1	3	4	4	3	2	2	5	4	3	2	3	5	4	4	4	5	54
1178	1	18	1	1	5	2	2	3	3	2	4	4	5	3	2	4	5	3	2	49
1179	2	18	1	4	4	1	3	1	4	5	5	3	4	5	3	1	3	3	5	50
1180	1	18	1	4	2	2	3	2	2	3	4	3	2	5	4	1	1	4	2	40
1181	1	18	1	4	4	5	3	2	2	1	1	2	3	2	3	2	2	1	4	37
1182	1	18	1	2	4	5	4	5	2	3	3	3	5	4	5	2	5	1	4	55
1183	2	18	1	4	4	2	2	2	4	1	2	3	2	1	2	2	4	3	1	35
1184	2	18	1	3	3	5	3	1	2	2	2	5	4	2	3	3	4	2	1	42
1185	1	18	1	1	3	3	3	3	1	1	3	2	1	4	1	4	5	5	1	40
1186	2	18	1	3	2	1	3	5	5	2	2	4	1	2	2	1	3	2	4	39
1187	2	18	1	1	2	3	1	3	1	2	1	3	2	2	2	2	2	1	1	28
1188	2	18	2	2	5	5	4	2	4	2	4	5	5	1	4	5	5	4	4	59
1189	2	18	1	1	2	3	2	2	2	1	5	1	2	1	2	4	2	2	4	35
1190	1	19	2	1	3	1	2	5	4	5	5	3	1	5	4	4	2	2	3	49
1191	1	18	1	1	2	1	2	1	1	1	2	1	1	2	1	1	1	1	1	19
1192	2	18	1	3	1	5	2	5	3	5	5	1	1	2	4	5	2	3	2	46
1193	2	18	2	1	3	4	5	2	3	1	3	3	2	3	2	3	4	1	5	44
1194	2	22	3	3	3	3	2	1	3	5	1	2	2	3	1	2	4	3	3	38
1195	1	18	1	1	2	3	3	1	1	5	1	5	5	2	3	4	5	4	1	45
1196	1	18	1	1	4	2	4	3	3	1	3	5	4	4	4	5	5	2	4	53
1197	2	18	2	2	1	1	3	1	1	2	1	2	1	1	1	2	3	1	2	23
1198	2	19	2	3	5	4	2	1	1	4	2	3	3	4	2	3	4	4	3	45
1199	2	18	1	1	4	1	4	3	3	3	2	1	3	3	3	2	4	2	2	40
1200	2	18	1	2	1	1	1	1	1	1	1	1	2	1	1	1	1	1	1	16
1201	2	18	1	4	5	4	5	1	5	2	2	2	3	3	3	3	4	5	5	52
1202	1	18	1	2	2	1	3	3	2	1	3	1	1	2	3	1	1	2	4	30
1203	1	18	1	1	5	3	2	3	3	4	2	5	2	4	1	3	3	5	4	49
1204	2	18	1	1	1	5	2	4	5	3	4	4	2	4	2	3	4	3	3	49
1205	2	18	1	4	2	3	4	5	3	3	4	1	2	3	3	3	2	1	3	42
1206	1	18	2	1	2	2	2	4	1	4	3	3	1	3	2	5	5	2	2	41
1207	1	18	1	4	2	5	2	2	3	5	1	2	5	1	1	3	5	2	3	42
1208	2	18	1	2	5	2	1	5	2	1	3	1	1	1	2	4	2	4	1	35
1209	1	18	2	4	2	2	2	2	2	4	5	5	1	4	2	1	4	2	2	40
1210	1	18	2	3	2	3	2	5	3	5	2	2	3	3	2	4	4	3	1	44
1211	2	18	1	4	5	5	4	5	3	4	3	3	3	5	3	2	4	3	5	57
1212	2	18	1	2	1	1	2	2	3	3	2	2	2	3	1	1	4	3	3	33
1213	2	18	1	3	2	2	5	4	4	3	3	5	5	1	3	1	2	4	2	46
1214	1	18	1	2	2	4	1	2	4	4	1	2	3	1	5	4	1	1	3	38
1215	2	18	1	2	1	5	2	2	3	3	1	2	5	5	3	1	2	4	3	42
1216	1	18	1	2	2	4	2	1	4	4	1	2	1	2	1	3	4	2	1	34
1217	1	18	1	4	1	3	2	4	2	2	2	4	2	3	2	2	3	5	1	38
1218	2	18	1	4	5	2	2	1	3	3	4	4	2	2	4	3	1	2	3	41
1219	2	18	1	3	1	1	1	1	2	1	1	1	2	2	1	1	3	1	1	20
1220	2	18	1	2	2	3	3	2	4	5	4	3	5	3	3	4	5	2	5	53
1221	2	18	1	2	3	4	4	3	2	1	3	2	5	4	3	4	3	3	4	48
1222	2	18	1	3	4	5	3	1	3	4	2	3	5	1	4	3	3	1	5	47
1223	1	18	1	1	3	2	2	3	3	5	2	2	4	2	1	1	3	2	2	37
1224	1	18	2	1	3	3	2	3	1	3	3	3	4	5	4	1	2	4	4	45
1225	1	18	1	2	5	4	5	2	3	4	2	1	5	2	2	2	5	3	2	47
1226	1	19	2	1	3	4	2	2	1	1	3	3	2	2	2	1	2	2	4	34
1227	2	18	2	1	1	3	2	1	2	4	1	1	2	4	3	3	4	2	1	34
1228	1	18	1	1	3	3	1	5	2	1	4	2	3	3	3	4	2	2	3	41
1229	2	18	1	1	3	3	4	2	3	1	5	2	3	1	2	3	4	2	2	40
1230	2	18	1	1	5	3	3	2	4	2	5	5	5	2	4	3	1	3	2	49
1231	2	18	1	4	1	2	1	1	2	2	3	1	2	2	3	3	3	3	2	31
1232	1	18	2	2	2	4	2	3	3	1	3	3	3	1	2	5	4	2	4	42
1233	2	18	1	2	2	3	5	1	2	5	1	2	5	3	2	1	1	4	5	42
1234	1	18	1	3	4	2	3	5	2	2	3	4	3	1	3	3	4	1	2	42
1235	1	18	1	1	2	3	1	2	1	1	1	4	1	2	2	1	2	3	2	28
1236	2	18	1	4	5	4	5	3	5	2	5	2	5	4	4	2	3	4	4	57
1237	1	18	1	3	3	1	5	4	2	3	2	2	2	3	3	2	3	2	2	39
1238	1	18	1	1	4	1	4	3	2	2	3	5	2	4	1	3	5	3	1	43
1239	2	18	1	2	1	2	2	2	3	3	2	4	2	2	2	3	2	2	3	35
1240	1	22	3	4	3	2	4	3	1	4	5	4	2	1	2	1	5	1	3	41
1241	2	18	1	4	1	2	2	3	2	1	1	2	1	2	2	3	3	2	1	28
1242	2	18	1	2	5	2	1	2	4	5	3	1	4	2	1	2	1	3	3	39
1243	2	18	1	2	1	2	2	3	2	2	3	3	1	2	1	1	2	3	1	29
1244	1	18	1	1	2	4	5	5	2	5	2	3	1	1	4	3	2	3	4	46
1245	1	18	1	4	4	1	4	1	2	3	3	3	3	5	4	1	4	5	3	46
1246	2	18	1	1	3	1	4	3	3	1	2	3	2	3	3	2	5	3	2	40
1247	1	18	1	4	4	4	2	4	2	5	2	4	4	4	3	5	4	5	3	55
1248	2	18	1	3	1	5	5	2	4	1	5	3	2	3	3	5	1	4	3	47
1249	2	18	1	2	2	5	2	2	2	3	1	2	2	4	2	3	2	4	2	38
1250	2	18	2	2	4	2	2	1	1	2	3	3	5	2	3	2	2	2	2	36
1251	1	18	1	1	3	3	5	5	4	1	4	5	3	5	5	5	1	4	2	55
1252	1	18	1	1	4	3	3	5	3	3	3	3	2	5	3	3	2	4	3	49
1253	2	18	1	1	1	1	4	3	3	1	3	2	5	4	5	2	2	5	1	42
1254	1	20	3	1	2	3	4	1	5	3	2	1	2	5	4	3	2	5	5	47
1255	1	18	1	3	2	2	2	1	3	5	1	2	2	2	2	3	2	3	2	34
1256	2	18	1	2	3	2	2	5	3	5	3	4	4	4	2	4	5	5	5	56
1257	2	22	3	1	3	3	2	2	1	5	3	3	3	3	5	2	5	5	5	50
1258	2	18	2	4	3	4	3	2	4	2	3	3	2	4	5	5	2	1	2	45
1259	2	19	2	4	1	1	2	1	3	1	1	2	3	2	2	1	3	1	2	26
1260	1	18	1	4	4	2	2	2	3	1	4	2	2	1	3	3	3	3	3	38
1261	2	18	1	4	3	5	3	4	1	3	2	3	5	1	2	5	2	5	3	47
1262	2	18	2	1	2	4	1	1	3	5	2	2	2	4	3	4	1	1	1	36
1263	1	21	3	2	1	2	4	5	2	2	5	1	3	4	4	5	3	4	4	49
1264	2	18	1	3	4	3	4	2	2	2	3	4	5	4	5	3	3	3	4	51
1265	2	18	1	3	2	1	4	5	2	1	5	2	5	4	5	2	4	2	2	46
1266	2	18	1	1	2	2	1	2	2	3	3	3	1	3	2	3	3	1	2	33
1267	2	18	2	3	4	1	3	3	2	4	1	2	4	5	5	5	3	2	3	47
1268	2	18	1	1	1	2	4	5	5	5	4	2	4	5	5	5	2	5	2	56
1269	1	18	1	1	2	1	5	2	4	2	3	5	4	4	3	4	4	3	4	50
1270	1	18	1	2	2	2	5	3	2	3	3	5	5	3	4	3	2	4	3	49
1271	2	18	1	2	2	2	3	2	3	3	2	2	1	4	2	1	1	2	2	32
1272	2	18	1	2	1	2	3	2	3	2	2	4	3	2	3	4	2	3	5	41
1273	2	18	1	1	1	5	4	4	4	3	3	3	1	3	4	3	3	2	4	47
1274	2	18	1	4	3	4	5	2	4	3	4	3	2	3	3	5	1	1	3	46
1275	1	18	1	1	5	2	3	2	1	3	3	2	2	4	1	4	1	3	2	38
1276	1	18	1	1	5	4	2	4	2	2	5	3	5	2	1	1	4	4	4	48
1277	2	18	1	4	3	4	1	2	2	2	1	5	2	5	2	5	2	2	1	39
1278	2	18	1	4	1	3	3	1	1	2	4	2	2	1	1	3	1	3	2	30
1279	2	18	1	4	4	1	3	1	3	1	3	2	2	3	2	4	2	3	3	37
1280	2	18	1	3	1	3	1	2	2	4	2	4	4	1	3	1	3	4	2	37
1281	2	18	1	3	3	3	2	2	1	3	4	3	2	2	2	1	3	5	3	39
1282	1	18	1	2	4	2	2	1	3	1	4	2	2	3	1	2	2	1	3	33
1283	1	18	1	1	2	3	3	1	5	1	2	2	1	2	5	2	3	2	5	39
1284	1	22	3	2	3	3	1	1	1	1	1	3	2	3	2	5	4	2	2	34
1285	2	18	1	2	2	2	2	3	2	3	4	1	2	1	1	2	2	5	2	34
1286	1	18	2	1	2	3	3	4	2	5	3	2	1	3	4	3	4	2	3	44
1287	1	18	1	3	1	1	2	3	3	1	2	2	2	1	1	2	1	3	5	30
1288	2	18	2	2	1	5	3	5	2	3	4	2	5	4	5	5	3	4	4	55
1289	1	18	2	1	4	3	3	1	1	3	4	5	2	5	2	3	3	4	4	47
1290	2	18	1	1	2	4	5	3	3	5	4	3	2	5	4	2	3	5	3	53
1291	1	18	1	3	1	5	2	4	3	3	5	3	3	1	1	3	5	2	5	46
1292	1	18	1	1	1	2	3	3	1	1	4	1	4	3	3	1	3	2	1	33
1293	2	18	1	3	3	2	2	1	3	3	2	3	3	4	5	1	3	2	4	41
1294	1	20	3	2	4	4	5	2	5	2	4	1	5	3	4	4	3	3	5	54
1295	1	18	2	2	5	2	1	3	3	1	2	1	3	5	5	3	2	4	2	42
1296	2	20	3	2	2	1	4	3	3	3	1	1	3	1	2	4	3	2	2	35
1297	2	18	1	3	3	4	3	1	2	2	1	2	2	3	4	1	4	3	2	37
1298	1	18	2	2	1	5	3	3	4	2	4	2	5	3	4	2	4	4	3	49
1299	2	19	3	3	2	3	2	4	2	3	3	2	1	2	3	1	2	3	2	35
1300	1	18	1	2	3	5	3	3	5	2	4	5	5	5	5	3	2	5	5	60
1301	1	18	1	1	2	1	3	1	5	1	2	2	5	3	4	2	2	2	4	39
1302	2	18	2	4	4	4	5	3	5	2	5	1	3	3	5	4	4	4	4	56
1303	2	18	1	3	3	3	4	2	3	3	2	2	2	1	2	2	4	3	3	39
1304	2	18	2	3	4	3	1	4	3	2	2	4	2	3	1	1	2	2	2	36
1305	2	18	1	3	4	5	2	2	3	2	1	2	3	3	2	2	5	2	1	39
1306	2	18	2	4	3	2	5	2	2	5	3	5	2	5	3	2	3	5	4	51
1307	1	18	1	3	5	3	5	5	5	4	5	2	5	5	4	3	2	5	5	63
1308	1	18	1	3	4	2	5	1	2	5	2	2	4	5	1	5	5	1	3	47
1309	2	18	1	3	3	2	2	4	5	1	2	3	2	3	1	4	3	3	5	43
1310	1	18	2	3	5	5	4	3	5	4	4	5	4	4	2	4	5	5	4	63
1311	1	18	2	2	2	2	2	5	3	3	5	2	2	2	3	3	4	4	4	46
1312	1	18	1	3	2	1	1	2	4	2	3	2	1	1	2	2	2	5	4	34
1313	1	18	1	1	1	4	3	3	4	3	3	5	5	2	3	5	3	4	3	51
1314	2	18	2	4	2	1	2	2	1	2	3	2	1	3	3	3	2	1	3	31
1315	2	18	1	4	2	2	1	2	2	2	1	2	4	3	3	3	1	1	1	30
1316	2	19	2	1	1	2	1	3	1	4	1	2	1	1	2	1	2	1	2	25
1317	1	18	1	3	1	1	1	1	1	1	1	1	1	2	1	1	1	1	3	18
1318	1	18	1	1	2	5	4	2	3	5	2	1	2	3	5	3	1	2	3	43
1319	1	18	1	1	3	3	2	2	1	3	3	1	3	1	1	2	2	3	3	33
1320	1	18	1	3	2	2	2	1	1	2	2	1	3	3	3	2	1	2	2	29
1321	2	18	2	1	2	4	2	5	2	5	5	3	4	4	5	3	5	2	3	54
1322	2	18	1	3	5	3	3	4	4	3	2	3	5	3	3	1	2	3	2	46
1323	2	18	1	3	3	1	3	2	1	1	1	2	1	1	4	1	2	3	4	30
1324	1	18	2	2	2	3	2	3	3	1	1	3	2	4	3	2	2	3	4	38
1325	2	18	1	1	3	2	2	1	3	4	2	2	5	2	2	1	3	1	4	37
1326	2	18	1	1	5	4	4	3	3	2	4	5	3	4	2	2	2	2	3	48
1327	2	20	3	2	1	2	2	2	2	5	2	2	1	1	4	4	4	2	3	37
1328	2	18	1	4	2	1	1	1	1	2	1	5	2	1	2	3	1	5	3	31
1329	1	18	1	3	5	1	2	1	3	2	2	1	3	2	2	3	3	3	2	35
1330	1	22	3	1	2	4	4	2	4	3	5	2	4	3	5	2	5	2	2	49
1331	1	18	1	3	3	5	5	2	4	4	4	1	3	3	4	3	5	5	3	54
1332	2	18	1	2	1	4	4	5	1	2	5	5	3	3	2	3	2	2	4	46
1333	1	18	1	3	5	1	3	5	2	5	5	2	1	2	2	2	2	5	1	43
1334	1	18	2	1	1	3	1	3	5	2	3	3	3	3	2	2	5	3	1	40
1335	1	18	1	3	2	4	2	2	1	2	3	1	3	4	4	3	4	1	3	39
1336	1	18	1	2	4	5	4	4	2	5	3	5	4	4	4	3	3	3	3	56
1337	2	18	2	4	3	2	2	1	4	1	2	2	2	3	1	2	3	3	1	32
1338	2	19	2	2	1	4	3	3	2	2	4	3	1	1	2	2	1	2	3	34
1339	1	18	1	3	5	1	4	2	3	1	3	5	5	3	3	4	5	4	2	50
1340	1	18	1	4	3	4	4	1	3	5	4	3	3	2	3	3	3	4	2	47
1341	1	18	1	1	4	2	3	3	4	2	3	5	2	5	5	1	1	4	1	45
1342	1	18	2	4	5	1	1	2	5	1	2	4	2	3	2	4	2	3	2	39
1343	1	18	1	3	4	2	1	3	2	5	4	3	3	3	4	3	2	3	4	46
1344	1	18	1	1	3	2	2	1	4	2	2	3	2	3	3	3	3	3	4	40
1345	1	19	2	1	2	5	3	3	1	4	5	4	4	2	3	5	5	2	3	51
1346	2	18	2	3	3	2	1	3	3	5	4	3	1	5	3	5	4	5	5	52
1347	2	18	1	1	2	1	2	2	3	4	2	1	5	4	5	3	3	3	3	43
1348	1	19	2	2	5	5	3	2	3	4	5	3	2	5	5	2	4	3	4	55
1349	1	18	1	2	5	4	3	4	5	3	2	4	2	2	4	3	2	2	3	48
1350	2	18	2	2	2	2	1	4	2	2	2	5	2	1	1	3	4	3	3	37
1351	1	18	1	1	3	2	4	3	2	2	2	4	5	4	4	3	5	5	3	51
1352	2	18	1	4	4	3	4	4	1	5	4	5	2	5	5	2	4	3	5	56
1353	2	18	2	4	2	2	3	2	5	1	5	2	3	2	1	4	2	3	2	39
1354	1	18	1	4	3	3	3	4	1	4	5	1	2	4	3	3	2	4	4	46
1355	1	18	1	3	1	3	4	2	3	5	3	4	2	4	1	2	2	4	4	44
1356	2	18	2	1	5	3	4	4	4	3	4	3	3	5	3	3	5	3	4	56
1357	1	18	2	3	3	2	2	2	3	3	4	3	5	1	3	3	5	1	4	44
1358	2	18	1	1	2	4	1	4	1	3	4	2	2	1	4	2	1	2	2	35
1359	2	19	2	1	3	1	2	1	3	4	3	4	4	3	1	4	3	3	3	42
1360	2	18	1	1	3	2	4	1	3	1	4	1	1	2	2	2	3	3	3	35
1361	1	18	1	2	1	2	4	4	3	3	2	1	2	4	5	2	1	2	4	40
1362	2	18	1	3	2	3	1	5	2	4	3	3	2	2	2	2	2	2	1	36
1363	1	18	1	3	3	3	3	1	1	2	2	4	2	2	2	1	3	4	2	35
1364	2	22	3	2	1	3	3	1	2	5	2	2	1	3	3	3	1	5	2	37
1365	2	18	1	1	3	2	3	3	5	5	2	4	4	5	1	3	2	3	2	47
1366	1	18	1	4	1	5	4	4	5	5	5	5	3	4	4	2	5	5	5	62
1367	2	18	1	2	3	3	3	1	1	3	2	1	3	4	3	4	4	3	3	41
1368	2	22	3	2	3	3	3	2	1	3	2	4	3	2	1	1	2	3	3	36
1369	1	18	1	1	2	3	2	5	1	5	5	3	3	2	3	2	2	4	3	45
1370	1	18	1	3	3	4	3	3	2	2	4	2	2	5	3	5	4	5	3	50
1371	1	18	1	3	3	3	4	3	4	3	5	3	3	4	2	5	4	4	2	52
1372	1	18	1	1	1	3	3	1	1	2	5	1	2	1	2	3	5	2	2	34
1373	1	18	1	1	5	4	2	3	4	5	5	2	3	3	5	5	5	3	3	57
1374	2	18	2	3	2	2	1	2	1	1	3	3	2	2	1	3	2	2	1	28
1375	1	20	3	3	3	2	2	2	2	3	2	1	3	5	2	3	2	1	4	37
1376	1	18	1	1	3	4	3	5	2	1	5	3	3	4	3	4	2	3	5	50
1377	2	18	2	4	1	3	2	3	4	2	2	2	2	2	3	5	3	1	1	36
1378	1	21	3	1	5	5	3	3	4	2	5	2	3	3	4	1	3	2	1	46
1379	2	18	2	2	1	3	2	3	2	2	3	2	1	5	2	2	2	2	2	34
1380	1	18	1	4	3	3	3	3	3	3	3	2	2	5	3	4	3	4	2	46
1381	1	18	1	2	3	3	2	4	3	3	1	1	1	1	4	1	1	2	4	34
1382	2	18	1	3	1	1	2	2	1	1	1	1	2	2	2	2	1	3	1	23
1383	2	18	1	2	3	4	1	4	3	3	1	3	4	2	2	3	1	2	1	37
1384	2	18	2	1	1	3	1	1	2	2	1	2	2	1	1	1	1	2	2	23
1385	2	19	3	4	3	2	1	1	1	1	1	3	2	1	2	1	2	1	1	23
1386	2	19	3	2	2	1	5	2	3	2	1	1	3	4	2	4	3	3	2	38
1387	1	18	1	4	2	4	2	2	2	2	1	3	2	2	4	2	2	3	5	38
1388	1	18	1	1	4	1	3	3	4	3	4	1	2	2	2	3	4	5	4	45
1389	2	19	3	1	3	2	3	2	2	3	2	1	3	5	3	1	5	3	2	40
1390	2	19	2	1	4	4	4	2	3	3	3	3	5	5	4	3	3	1	2	49
1391	2	18	1	3	2	3	4	3	3	1	2	4	2	2	2	3	4	3	3	41
1392	1	21	3	2	3	1	4	2	3	3	1	4	3	2	1	5	3	1	2	38
1393	1	18	2	4	2	3	3	3	2	3	2	1	3	5	1	2	3	2	2	37
1394	2	18	1	2	4	3	1	5	3	3	2	3	1	1	3	1	2	3	3	38
1395	1	18	1	4	4	2	4	3	3	4	2	2	2	3	3	4	3	2	2	43
1396	2	18	1	1	4	2	2	5	1	2	4	3	5	3	1	3	5	4	5	49
1397	2	18	1	4	3	5	5	2	3	3	5	5	1	3	3	2	1	4	4	49
1398	1	18	1	3	2	1	3	2	3	2	1	2	2	3	2	3	2	5	4	37
1399	2	18	2	3	4	1	3	1	3	2	3	3	5	3	3	3	5	3	2	44
1400	2	18	1	3	2	4	2	4	4	1	3	2	2	2	4	2	1	5	3	41
1401	1	18	1	3	2	2	3	3	4	2	5	5	3	4	5	4	2	3	5	52
1402	2	18	1	2	5	2	3	5	4	3	4	1	5	3	5	5	4	2	1	52
1403	1	18	1	1	3	2	3	3	4	2	4	3	5	3	1	1	1	2	4	41
1404	2	21	3	1	3	4	5	3	1	2	2	3	3	1	3	3	5	4	5	47
1405	1	18	1	4	3	3	5	2	3	4	3	4	2	2	1	3	2	2	5	44
1406	2	18	1	2	2	2	1	3	3	1	2	3	2	2	2	3	4	2	2	34
1407	1	19	2	3	1	3	5	1	5	5	1	5	2	4	2	2	3	3	2	44
1408	1	18	1	2	1	4	2	3	5	4	3	2	4	2	5	5	3	5	4	52
1409	2	18	1	1	2	2	2	3	1	2	2	2	2	1	2	2	1	2	2	28
1410	1	18	1	1	3	4	2	3	2	1	1	1	2	3	4	4	1	3	4	38
1411	1	18	1	3	2	3	2	2	5	4	2	2	3	4	3	2	4	3	3	44
1412	2	18	1	2	2	2	2	2	2	2	1	4	2	1	4	4	4	2	2	36
1413	2	18	1	1	3	3	3	2	4	1	5	3	3	4	2	1	1	1	3	39
1414	2	18	1	2	2	4	2	2	3	5	1	2	2	4	2	4	3	3	4	43
1415	2	21	3	1	5	2	3	1	4	4	3	2	3	5	5	4	4	3	4	52
1416	1	18	1	2	2	1	2	2	3	3	5	1	3	3	2	2	2	1	4	36
1417	1	18	1	1	2	3	1	2	3	3	2	3	2	1	3	3	5	1	3	37
1418	1	18	1	3	2	2	3	1	2	4	3	2	2	2	3	5	5	1	2	39
1419	2	18	1	1	3	5	3	4	4	5	4	5	5	2	4	5	2	2	5	58
1420	2	18	2	2	1	4	3	5	3	5	3	3	4	5	4	4	3	5	5	57
1421	2	18	1	1	4	3	4	5	2	5	4	2	2	2	2	4	3	4	3	49
1422	2	19	3	1	4	3	3	1	2	3	1	1	5	4	2	4	4	2	4	43

## Sheet: CMNI22_Items
ID	CMNI1	CMNI2	CMNI3	CMNI4	CMNI5	CMNI6	CMNI7	CMNI8	CMNI9	CMNI10	CMNI11	CMNI12	CMNI13	CMNI14	CMNI15	CMNI16	CMNI17	CMNI18	CMNI19	CMNI20	CMNI21	CMNI22	CMNI_POW	CMNI_DOM	CMNI_VIO
1001	0	2	1	0	0	1	3	0	0	1	0	2	0	1	3	2	1	2	0	0	0	0	3	1	2
1002	1	3	1	0	2	1	3	1	2	3	1	0	1	1	0	0	2	2	2	2	0	1	8	6	3
1003	3	2	0	3	3	3	0	1	2	3	3	3	2	3	0	0	1	3	1	3	1	2	16	9	5
1004	1	1	0	2	1	2	3	1	1	1	0	3	0	3	1	0	2	1	3	0	1	0	7	3	1
1005	3	3	0	3	2	0	2	1	3	0	1	1	1	3	1	0	0	3	2	0	2	3	15	8	6
1006	3	2	0	3	1	2	0	1	1	1	3	2	0	0	1	1	3	1	0	2	1	3	12	7	5
1007	2	2	3	3	2	0	3	3	0	3	1	2	2	3	1	2	0	3	1	1	3	1	14	10	4
1008	1	3	0	3	1	2	3	3	0	0	3	0	2	1	3	0	0	3	3	0	3	2	17	8	7
1009	2	1	2	0	2	1	1	3	1	3	0	3	0	2	1	3	3	0	0	0	0	3	8	5	3
1010	2	1	2	1	2	1	2	2	2	0	2	3	3	3	0	1	0	3	0	3	2	3	10	10	7
1011	2	2	0	2	0	0	1	3	3	2	3	0	2	2	0	1	0	0	1	1	0	3	11	8	3
1012	2	1	1	1	1	0	0	3	2	2	2	2	2	3	3	2	3	0	2	0	1	3	10	7	3
1013	0	1	1	2	2	1	0	1	0	2	1	3	0	1	0	3	1	0	2	2	0	3	5	4	3
1014	3	2	3	2	2	0	1	3	1	2	1	2	0	3	3	2	1	3	2	3	1	1	13	8	4
1015	2	3	1	1	2	0	0	1	2	0	1	1	0	2	3	2	2	3	3	0	2	2	7	8	5
1016	3	3	3	2	0	1	3	1	1	1	1	2	1	0	0	3	1	0	0	3	2	3	13	8	4
1017	1	1	1	2	2	3	2	3	3	2	1	1	1	1	1	0	1	1	2	1	2	3	14	9	4
1018	0	3	0	2	1	0	0	1	0	3	1	2	3	2	0	2	2	0	0	1	0	1	10	2	1
1019	2	2	1	0	1	0	2	2	1	1	0	1	3	3	1	0	3	2	2	1	3	2	12	6	4
1020	0	3	2	2	1	1	1	2	1	1	1	3	3	3	3	0	1	2	2	0	0	3	12	5	5
1021	0	0	2	3	2	1	3	2	1	1	1	3	1	0	1	3	2	2	0	0	2	2	7	8	4
1022	3	2	2	2	1	0	3	0	2	0	2	0	2	0	3	0	3	1	3	3	3	3	9	10	5
1023	2	1	2	3	3	1	3	3	0	3	0	0	2	2	3	2	1	2	0	1	2	2	13	8	4
1024	1	3	1	1	1	2	3	2	1	0	3	3	3	2	2	2	1	1	0	3	1	3	13	8	5
1025	2	0	3	1	1	1	1	1	0	3	1	3	0	1	3	0	1	1	3	1	1	2	5	6	3
1026	2	2	0	2	0	3	1	2	2	1	1	0	1	3	1	2	3	3	1	0	3	2	13	6	5
1027	3	2	0	0	2	3	0	0	2	1	0	0	0	2	3	0	3	3	1	1	1	1	8	5	5
1028	2	1	1	3	2	0	0	2	1	0	2	3	3	3	1	3	3	3	2	0	3	1	14	9	5
1029	2	1	2	3	3	3	1	2	1	3	1	0	2	1	1	3	3	3	1	1	2	3	14	9	6
1030	3	3	1	0	2	2	3	3	2	0	1	1	1	3	1	1	3	3	1	1	1	1	14	7	6
1031	3	2	2	0	2	0	2	3	1	1	1	3	0	2	3	1	0	2	3	1	0	2	9	6	4
1032	3	1	1	1	3	3	0	3	3	3	1	3	2	3	0	1	3	2	3	2	2	3	16	10	5
1033	3	1	0	2	0	0	1	2	3	3	2	1	1	2	1	2	3	3	1	0	3	1	9	8	5
1034	2	2	3	2	2	3	2	1	2	0	0	1	0	2	3	1	1	3	3	1	0	1	12	8	4
1035	1	0	3	2	2	1	0	1	0	2	1	0	0	0	0	3	2	1	1	2	1	1	5	7	2
1036	2	1	0	0	0	0	3	0	1	0	0	2	3	2	2	0	1	2	2	3	1	1	6	2	3
1037	3	2	2	1	3	3	0	3	2	1	2	0	3	2	3	0	3	3	0	1	2	2	17	11	5
1038	0	3	1	3	1	3	1	0	0	3	0	0	1	1	1	2	2	2	3	2	2	2	10	4	4
1039	2	2	2	3	1	3	3	3	3	0	1	1	1	2	2	0	2	3	1	2	2	1	14	10	6
1040	3	1	3	1	2	3	1	3	0	0	1	3	0	2	2	0	3	1	3	3	0	2	12	7	3
1041	1	1	1	3	0	1	0	1	1	3	0	0	1	2	3	2	2	0	1	3	1	1	8	3	1
1042	2	2	0	3	0	3	1	2	2	2	1	1	1	1	3	2	0	2	2	2	3	1	15	6	3
1043	1	3	1	1	2	2	3	1	3	1	0	3	0	3	1	2	3	2	0	3	1	0	9	7	2
1044	3	1	1	1	0	1	2	1	2	2	1	2	0	2	2	1	2	1	2	3	1	0	7	5	1
1045	3	2	3	1	0	1	0	2	2	2	1	0	2	3	0	0	3	2	2	3	1	3	12	8	6
1046	2	2	0	1	3	1	3	2	0	3	2	1	3	2	1	3	2	2	0	3	1	2	11	8	4
1047	0	1	1	2	1	1	2	2	0	0	0	1	2	0	1	3	1	2	1	0	1	2	8	3	4
1048	0	0	1	3	2	1	0	2	2	2	2	1	2	0	2	0	3	1	2	3	0	2	8	7	3
1049	0	2	1	3	1	1	1	3	1	3	1	0	2	1	0	0	1	3	0	0	1	3	11	5	6
1050	2	3	1	2	0	2	3	0	3	3	2	2	3	0	3	3	0	3	1	1	3	1	13	9	4
1051	0	3	1	3	3	0	0	1	2	1	1	1	1	3	1	0	0	3	1	0	1	3	10	8	7
1052	0	2	3	2	2	0	2	3	1	2	1	0	1	3	3	1	1	1	1	2	3	2	9	10	3
1053	0	3	0	2	2	3	2	2	2	1	3	2	0	3	1	3	0	3	1	0	2	2	11	9	7
1054	3	0	0	2	1	1	3	1	1	2	1	1	1	3	0	3	0	2	0	1	1	0	9	4	2
1055	0	1	0	3	3	0	1	3	1	0	1	1	1	2	3	1	3	0	3	2	1	1	9	6	1
1056	1	2	0	0	3	0	0	2	2	2	0	1	1	3	3	3	1	1	0	0	1	3	6	6	4
1057	2	3	2	3	1	1	3	1	1	1	3	2	3	3	0	3	0	1	2	2	1	3	14	8	4
1058	3	0	2	2	2	0	1	0	0	2	1	2	3	1	2	2	1	2	2	1	1	2	13	6	4
1059	1	3	1	0	2	2	3	1	1	2	0	1	1	3	1	1	1	2	2	3	0	2	8	4	4
1060	2	1	1	2	2	1	3	2	1	1	0	2	0	3	3	2	2	3	0	0	1	2	8	5	5
1061	3	3	2	1	3	3	2	3	1	2	3	1	0	2	2	1	2	3	0	2	0	2	15	10	5
1062	2	3	1	3	3	3	0	1	2	3	1	2	1	0	1	2	2	3	2	0	1	1	13	9	4
1063	3	3	0	0	1	1	0	2	2	0	0	1	0	3	3	0	1	0	0	3	1	0	10	4	0
1064	0	2	1	3	3	3	1	2	3	0	0	2	3	1	2	0	3	3	3	3	1	3	14	11	6
1065	2	1	3	3	0	3	3	1	2	2	2	2	1	0	0	2	0	2	0	1	0	2	11	8	4
1066	3	3	2	1	0	2	2	1	1	1	2	3	1	2	1	0	3	0	0	3	1	3	12	6	4
1067	1	3	3	2	0	3	1	1	2	0	0	1	0	2	2	1	1	3	1	2	3	2	11	9	5
1068	1	3	3	3	3	2	2	2	1	3	2	2	3	2	1	2	3	1	2	0	1	3	16	10	5
1069	2	0	1	2	1	3	2	1	2	2	0	3	0	1	1	1	3	0	2	2	0	2	8	4	2
1070	2	3	2	0	3	1	1	2	2	2	1	3	2	3	0	3	1	1	3	0	0	3	11	8	4
1071	1	0	1	2	1	3	3	3	1	2	1	3	0	0	2	0	0	1	0	1	0	2	9	4	3
1072	1	3	3	1	2	2	2	1	1	0	2	2	3	0	2	3	2	3	1	3	2	1	12	10	5
1073	1	2	1	1	0	2	3	3	3	2	0	0	0	0	3	2	0	1	0	1	1	2	9	5	3
1074	3	0	1	3	2	1	2	3	3	0	2	2	0	3	2	2	1	2	1	1	2	3	12	10	6
1075	0	0	1	0	0	3	3	1	0	0	1	2	3	1	0	1	3	1	3	3	1	1	10	3	2
1076	3	1	0	1	3	0	0	3	0	2	3	2	1	3	1	0	1	2	0	3	1	1	10	7	3
1077	3	3	0	0	0	0	2	3	1	2	2	3	1	1	3	3	1	2	3	2	1	1	11	4	3
1078	2	3	0	1	2	3	2	1	1	1	3	1	0	3	2	2	1	2	2	2	0	3	12	6	5
1079	2	3	1	0	1	0	3	0	2	2	0	1	2	1	2	1	0	2	3	0	1	0	8	5	2
1080	1	1	0	0	1	2	0	1	1	3	2	0	3	2	3	2	0	2	0	2	0	3	9	4	5
1081	2	1	2	3	1	3	1	1	1	2	2	1	1	0	2	3	0	3	3	2	0	2	13	6	6
1082	1	3	0	0	2	3	1	3	1	0	3	3	1	2	0	2	0	3	2	2	1	1	17	8	5
1083	2	3	2	1	3	3	0	1	1	2	3	0	2	0	2	1	3	3	3	2	1	2	17	10	5
1084	2	3	1	3	1	2	2	1	3	1	0	2	3	1	0	3	0	3	0	0	1	1	16	9	4
1085	1	2	2	1	2	0	3	0	1	1	0	1	2	2	2	2	2	0	1	1	2	2	6	7	2
1086	2	3	3	3	3	2	3	2	0	3	3	3	1	0	3	1	3	3	3	0	1	3	15	10	6
1087	2	3	1	3	1	0	2	3	3	1	1	2	1	2	2	0	0	2	1	3	1	1	13	7	3
1088	3	3	1	2	3	2	2	0	3	1	2	2	2	0	3	2	2	3	2	1	1	2	13	12	5
1089	1	1	3	3	2	2	3	3	1	0	2	1	1	2	0	0	3	2	3	2	1	3	12	10	5
1090	3	0	0	2	0	1	1	1	0	1	3	1	3	3	2	1	3	1	3	1	2	1	11	6	2
1091	1	3	1	2	0	0	1	1	2	3	2	1	1	1	0	0	3	0	1	3	2	3	10	7	4
1092	3	3	1	1	2	2	2	1	2	0	1	0	0	0	2	0	1	0	0	0	1	3	15	7	4
1093	1	3	0	2	3	3	0	2	1	1	3	1	2	2	0	2	1	2	0	0	2	3	15	9	6
1094	1	2	3	1	0	3	0	3	1	0	1	2	1	2	2	2	1	1	3	2	0	3	13	6	4
1095	2	2	0	2	1	1	0	3	3	1	2	0	2	0	3	3	1	1	0	3	3	3	12	9	4
1096	3	1	1	0	3	1	1	3	3	0	3	0	3	2	2	3	2	2	0	1	1	3	14	12	7
1097	3	1	0	0	1	0	2	2	2	1	2	3	3	2	1	2	0	3	2	3	3	0	13	10	6
1098	3	1	0	1	3	1	1	2	0	2	0	0	0	0	3	3	3	2	0	0	1	0	8	4	2
1099	0	0	0	2	1	3	3	3	1	3	3	3	1	1	3	0	3	3	2	0	2	2	14	7	5
1100	1	0	3	2	1	3	3	3	0	2	1	3	1	2	0	0	0	2	1	3	1	0	10	6	2
1101	3	1	1	3	0	2	3	1	2	2	1	0	0	2	3	2	3	2	2	1	2	1	12	6	3
1102	3	1	3	1	2	3	1	3	1	0	1	3	1	2	3	3	2	3	1	0	1	1	15	8	5
1103	0	0	0	1	1	1	2	1	0	0	0	0	1	3	3	0	1	1	1	2	0	1	4	1	2
1104	3	2	3	1	2	3	0	2	2	1	0	2	0	2	3	3	1	3	0	3	0	3	13	9	7
1105	3	3	1	1	3	2	0	3	2	1	1	0	3	2	0	1	3	3	3	2	3	3	17	12	7
1106	0	0	1	3	3	3	0	2	0	3	1	0	0	2	0	1	3	2	0	1	0	0	8	5	2
1107	2	3	3	1	1	3	3	2	1	3	1	3	2	3	0	0	1	0	0	1	2	3	15	9	7
1108	0	3	1	0	0	2	3	1	0	2	0	0	1	3	3	2	0	0	0	2	1	2	8	2	2
1109	1	3	0	1	1	3	2	1	2	3	3	2	3	0	2	0	1	3	2	1	1	1	15	7	7
1110	2	1	1	3	1	2	3	1	2	1	0	1	2	0	1	3	0	2	2	0	1	1	11	5	3
1111	3	2	3	1	2	3	0	3	2	2	2	3	1	2	2	1	1	2	0	1	0	2	18	9	4
1112	2	0	0	3	0	1	0	2	0	0	2	1	1	2	2	0	2	1	3	3	3	1	9	5	2
1113	2	2	1	1	0	1	0	3	2	2	1	1	0	2	1	0	2	0	0	2	0	0	10	4	0
1114	3	3	3	2	1	2	3	3	3	3	0	1	3	1	0	1	0	3	3	3	1	0	18	10	5
1115	3	2	1	3	2	1	3	0	0	1	0	0	1	1	2	2	1	1	1	0	3	3	10	8	5
1116	1	2	1	1	2	1	2	1	1	1	0	3	2	3	2	1	2	1	1	1	0	1	8	4	2
1117	1	3	2	2	2	1	1	0	2	0	2	2	3	3	2	1	2	2	2	0	1	2	10	9	4
1118	1	0	2	1	1	0	0	0	0	3	0	3	1	0	2	0	3	2	1	2	2	1	3	5	3
1119	1	2	0	3	1	2	0	2	1	1	2	1	2	1	0	1	0	3	1	2	1	0	12	5	3
1120	3	0	0	0	2	0	3	2	1	1	0	0	3	1	3	3	1	2	3	3	0	1	10	3	3
1121	0	3	1	2	0	0	3	3	3	1	0	3	3	2	3	0	3	2	0	2	1	0	12	5	2
1122	1	2	0	2	1	1	0	0	2	0	3	3	3	3	2	1	2	2	3	3	0	2	9	7	4
1123	1	2	1	3	1	0	1	2	1	3	1	0	1	2	3	1	2	2	2	1	1	1	10	5	3
1124	2	0	3	3	1	0	0	2	1	1	0	3	1	0	1	1	3	0	3	3	0	0	8	6	0
1125	3	1	2	3	3	1	2	3	1	2	2	0	3	3	0	2	2	3	0	2	2	2	18	10	5
1126	3	1	1	1	1	3	0	0	1	1	3	2	3	3	3	3	2	2	3	3	0	1	11	6	3
1127	2	3	2	1	3	3	3	3	2	1	1	0	0	2	1	1	3	3	0	3	1	2	16	9	5
1128	3	3	3	1	0	1	0	0	0	2	0	2	1	1	3	2	3	2	2	1	3	1	11	6	3
1129	2	3	0	0	3	2	0	1	1	3	0	3	0	1	0	1	0	1	0	2	1	3	9	5	4
1130	3	2	0	0	0	3	2	1	2	2	1	0	2	3	0	2	3	2	2	3	2	3	12	5	5
1131	3	1	1	2	1	3	1	2	1	2	1	1	3	0	2	2	3	3	3	2	3	1	14	8	5
1132	1	0	1	0	2	3	3	1	2	1	2	1	1	1	0	0	0	0	2	3	0	3	8	7	3
1133	2	3	2	1	2	2	2	3	0	2	3	1	0	1	2	1	3	2	1	0	2	1	11	10	3
1134	1	3	0	3	1	3	2	1	2	0	3	1	2	0	3	0	0	1	1	2	1	2	13	9	3
1135	2	3	3	2	1	3	0	2	2	2	3	2	1	3	0	0	2	3	0	3	1	3	13	10	8
1136	0	2	3	2	2	1	2	3	1	1	0	2	2	3	3	3	2	1	2	0	1	3	12	7	4
1137	2	3	1	3	1	2	2	2	3	2	1	2	3	2	1	1	1	3	0	2	1	3	15	7	6
1138	0	1	0	1	0	1	2	1	0	1	1	1	0	3	1	0	0	3	1	0	2	0	4	3	3
1139	2	1	1	2	1	2	2	1	1	3	1	2	0	0	1	1	2	3	0	3	3	1	8	7	4
1140	1	2	0	2	2	2	3	1	1	3	0	1	1	3	2	0	0	1	1	2	1	3	9	4	5
1141	3	2	3	2	1	3	0	3	3	1	2	2	1	3	1	3	0	3	1	1	3	2	17	12	5
1142	2	2	2	0	1	2	1	0	1	2	0	0	2	3	1	3	2	0	0	3	2	2	8	6	2
1143	3	2	1	3	1	1	0	1	1	0	2	3	0	3	1	3	0	2	0	0	2	1	11	7	3
1144	3	1	1	0	0	3	1	1	0	0	1	0	3	2	3	2	1	0	0	0	3	3	13	5	3
1145	1	1	2	3	1	0	1	1	0	1	1	0	1	3	2	0	0	1	0	3	2	2	7	6	3
1146	0	3	1	2	3	1	2	1	3	3	1	1	3	0	3	2	3	3	0	0	1	1	13	10	5
1147	2	3	1	3	0	2	2	3	0	0	2	0	3	1	0	1	3	3	2	2	3	1	17	9	4
1148	0	0	1	1	1	0	1	1	2	3	2	1	2	3	0	2	3	1	1	1	0	1	4	6	2
1149	2	1	1	2	1	3	2	2	3	3	2	2	1	3	0	0	0	2	0	2	2	2	12	9	4
1150	3	3	1	1	2	0	0	3	2	2	2	3	1	3	0	0	2	1	2	2	2	2	13	9	3
1151	2	1	1	3	3	1	3	0	2	0	0	2	3	0	2	1	3	3	2	0	2	2	12	8	6
1152	3	0	1	2	0	1	3	1	2	0	2	1	1	1	3	3	1	1	0	3	1	3	10	6	4
1153	1	1	0	1	1	1	3	0	1	3	2	2	2	3	3	0	0	0	3	2	2	3	6	6	5
1154	1	3	3	3	0	2	0	0	0	0	2	3	1	0	3	1	1	1	0	3	1	2	11	9	3
1155	3	0	1	0	2	2	2	3	1	2	3	0	3	0	1	0	1	3	3	0	1	3	14	9	6
1156	2	3	0	1	2	0	2	3	0	2	0	1	0	1	1	1	2	2	3	0	1	1	10	3	3
1157	2	2	3	3	2	1	3	2	1	3	0	2	1	1	0	3	0	1	0	1	3	3	13	11	7
1158	2	3	2	1	1	2	1	3	1	3	0	2	0	0	2	2	0	2	3	0	1	1	12	5	3
1159	1	3	1	1	2	1	2	3	2	2	2	1	1	2	3	3	2	3	2	2	2	1	13	9	5
1160	1	1	0	2	1	3	3	1	3	1	1	0	3	2	1	1	1	1	1	3	1	2	11	8	3
1161	1	1	1	3	2	2	3	2	2	0	0	1	1	0	3	3	3	0	2	0	0	2	10	5	2
1162	0	0	0	2	2	0	3	0	2	1	0	3	3	1	3	1	3	2	2	2	2	1	6	6	3
1163	1	0	1	0	2	3	2	3	2	3	0	2	0	2	3	2	0	1	2	0	1	3	8	6	5
1164	0	1	2	0	2	3	1	2	1	1	1	1	3	2	3	0	3	2	3	3	2	2	10	8	4
1165	1	2	3	0	2	3	0	2	0	2	0	0	0	1	1	1	1	2	0	3	2	1	8	8	3
1166	3	1	1	2	0	0	1	2	0	2	2	0	1	0	0	3	1	0	0	2	0	0	9	3	0
1167	1	2	0	3	1	1	2	2	2	2	0	3	3	0	3	1	1	2	1	0	2	2	13	5	4
1168	2	1	2	3	2	3	1	3	2	0	2	0	3	1	1	1	0	2	3	0	3	3	16	11	5
1169	2	2	0	1	1	0	3	0	1	1	1	2	1	1	0	3	2	0	2	2	1	0	6	4	0
1170	1	1	1	1	0	2	0	1	1	0	1	0	3	3	0	3	1	3	1	3	2	0	10	5	3
1171	3	2	2	1	1	2	0	1	0	1	1	0	3	3	2	1	1	2	3	1	3	2	14	7	4
1172	3	1	1	1	3	2	0	3	3	1	1	1	1	1	2	1	2	2	0	2	1	2	14	9	4
1173	3	1	2	3	0	1	0	0	3	3	0	3	2	0	2	1	3	2	3	3	0	1	10	6	3
1174	2	0	1	0	2	2	3	1	2	3	0	3	2	3	0	3	1	1	3	3	0	1	7	5	2
1175	0	1	1	1	2	3	1	0	2	2	0	0	3	0	3	3	3	0	2	3	3	3	10	9	5
1176	1	0	0	1	3	3	2	1	2	3	2	1	2	0	2	1	3	3	0	3	0	1	10	9	6
1177	1	2	2	2	3	3	2	1	1	1	1	3	1	1	2	1	0	3	1	3	1	2	12	8	5
1178	1	2	3	3	0	0	3	2	2	1	0	2	3	1	0	3	3	1	3	3	0	3	14	5	5
1179	2	3	1	0	3	2	0	3	1	3	0	3	3	1	3	3	1	2	0	2	2	2	16	7	4
1180	2	1	2	3	1	0	2	2	2	2	1	3	2	0	2	1	0	1	2	0	2	3	10	8	5
1181	2	1	0	3	0	0	2	1	0	2	2	1	2	3	2	2	0	1	0	2	1	0	9	3	1
1182	1	3	2	2	0	1	3	1	3	1	0	0	1	0	3	2	1	2	2	1	1	1	9	6	3
1183	3	0	1	2	1	0	2	3	1	0	1	3	3	0	2	1	0	1	2	0	2	2	11	6	3
1184	3	2	2	0	0	0	1	1	0	2	3	2	3	3	2	3	2	1	2	3	0	2	10	6	3
1185	3	1	0	1	1	3	1	2	3	2	3	0	3	3	1	1	2	2	3	0	2	3	15	10	5
1186	2	2	1	3	2	2	2	2	0	3	3	0	2	0	3	3	0	3	3	3	1	0	14	9	4
1187	1	1	1	1	0	1	3	1	0	3	1	0	0	3	1	2	1	0	0	2	0	1	5	2	1
1188	3	3	1	2	3	3	0	2	3	3	1	3	2	1	3	2	2	0	2	2	2	3	16	11	3
1189	1	2	0	0	2	2	1	3	1	3	0	1	0	2	1	1	2	2	3	1	2	0	8	5	2
1190	1	0	2	2	1	1	1	3	0	0	3	0	0	2	3	2	0	2	0	2	1	3	9	7	6
1191	3	2	0	1	1	0	2	0	1	2	2	3	0	0	3	0	3	3	1	3	2	1	6	6	5
1192	0	1	1	3	0	1	3	1	1	2	2	3	1	2	1	2	0	3	0	0	3	3	10	7	7
1193	2	1	2	3	3	3	0	1	2	1	2	2	3	0	2	0	0	3	0	0	1	1	13	10	5
1194	2	0	0	3	2	3	2	1	2	2	2	1	2	3	1	1	1	3	3	2	0	1	11	6	4
1195	1	1	1	1	1	3	1	0	3	0	1	3	3	2	2	3	1	1	1	2	3	3	11	9	4
1196	0	2	3	2	0	1	1	3	1	3	1	3	2	0	3	2	3	2	3	2	0	1	10	6	3
1197	1	1	1	3	3	3	2	1	0	1	3	2	3	2	3	0	1	3	0	3	2	2	17	11	5
1198	3	1	0	3	2	3	3	1	2	2	3	3	2	0	0	1	1	3	3	3	2	1	13	9	5
1199	3	1	1	3	0	1	2	1	3	1	0	3	1	0	1	0	1	2	1	1	1	3	10	6	5
1200	2	3	1	1	2	2	3	1	1	2	0	0	0	2	3	1	2	0	1	2	1	2	9	5	2
1201	3	2	1	1	3	2	3	3	0	2	1	3	1	2	1	1	1	1	3	0	3	3	15	8	5
1202	3	1	1	0	1	1	3	1	1	1	3	3	1	3	2	2	2	0	3	0	0	3	7	6	4
1203	1	3	0	2	3	0	2	2	1	0	1	1	3	2	2	1	1	3	3	1	2	1	13	7	5
1204	3	2	0	2	3	3	1	0	2	0	3	0	3	1	2	2	3	3	2	2	2	1	15	10	6
1205	0	3	1	0	0	2	2	1	1	0	1	1	1	0	1	0	1	1	0	2	2	1	8	5	2
1206	1	0	0	0	0	1	2	3	1	2	1	1	3	0	3	0	1	0	3	0	3	0	8	5	0
1207	1	3	1	1	1	2	3	0	2	3	3	0	0	2	2	1	0	3	2	0	0	1	8	7	5
1208	1	1	0	0	0	3	3	2	1	2	1	2	0	3	1	0	2	1	3	0	1	2	7	3	3
1209	2	1	2	0	0	0	3	0	1	2	0	3	1	1	2	2	3	1	3	3	2	0	4	5	1
1210	3	2	2	3	1	2	3	3	0	1	2	1	2	0	1	1	0	0	0	1	1	0	15	6	0
1211	2	3	2	3	2	3	1	3	1	1	1	0	2	1	3	1	3	1	1	3	3	3	17	10	5
1212	0	3	1	0	3	3	0	2	0	1	1	0	3	2	2	1	1	3	2	0	2	2	11	7	5
1213	3	1	3	2	0	1	3	1	1	3	1	0	2	0	3	2	0	0	3	3	1	1	10	7	1
1214	2	2	3	2	0	1	2	2	0	3	3	0	0	0	0	3	2	1	0	3	0	1	9	6	2
1215	2	2	0	2	0	0	1	0	3	3	1	2	3	3	0	0	3	3	0	2	2	1	11	6	4
1216	0	0	0	3	2	1	1	3	1	1	2	2	0	3	2	3	3	1	3	0	0	0	8	5	1
1217	3	0	1	3	1	1	1	2	2	0	1	3	1	3	2	1	3	1	3	2	3	3	13	8	4
1218	3	3	1	1	0	2	0	0	3	3	2	2	3	0	0	3	1	3	3	2	1	1	12	7	4
1219	0	1	1	1	2	1	2	2	2	0	0	1	2	1	2	0	0	0	3	2	2	3	7	7	4
1220	1	1	1	1	3	2	1	3	1	0	2	2	3	1	1	0	3	2	3	3	0	2	13	8	4
1221	1	3	1	2	3	2	3	2	1	3	2	3	3	1	3	1	1	3	2	0	0	1	15	9	4
1222	2	2	1	1	0	2	3	0	0	2	0	2	0	2	2	2	3	1	2	3	0	0	7	1	1
1223	1	1	1	0	1	3	0	1	1	3	2	0	3	1	3	3	0	1	2	0	0	3	10	5	5
1224	2	2	1	3	1	2	0	1	2	1	1	3	3	2	0	2	1	3	0	2	1	0	13	6	5
1225	3	2	0	0	1	1	0	1	0	1	1	2	0	3	3	0	2	1	3	3	1	2	9	3	3
1226	0	1	0	3	0	0	1	1	3	1	3	2	1	1	3	3	2	2	1	2	1	0	7	7	2
1227	0	3	3	1	0	2	2	3	0	0	0	0	1	0	2	1	1	2	0	2	3	2	11	6	4
1228	0	3	1	2	1	3	2	1	2	0	1	0	2	0	3	0	1	0	3	1	0	3	11	5	4
1229	1	0	0	2	1	2	1	3	0	3	0	0	0	2	0	0	2	1	0	1	0	0	8	1	1
1230	2	3	3	1	1	2	1	1	1	2	1	3	3	2	2	0	3	1	2	0	1	3	12	7	4
1231	1	2	0	2	3	3	0	3	0	2	2	3	2	2	3	3	0	3	0	0	3	1	13	8	5
1232	1	3	2	1	0	1	2	1	2	0	2	0	3	3	3	3	3	3	1	2	3	1	13	9	4
1233	3	3	0	1	1	3	0	0	0	0	2	2	0	3	1	2	3	2	2	2	3	0	16	6	2
1234	1	2	1	3	1	2	2	3	3	3	1	1	0	2	1	3	3	2	3	3	2	2	11	8	4
1235	1	1	1	1	1	1	0	2	1	1	0	2	0	3	0	0	1	0	3	0	1	0	6	4	0
1236	3	1	1	3	2	2	2	2	1	3	3	0	0	3	2	3	3	1	0	1	2	2	13	9	3
1237	1	3	0	1	3	0	1	3	1	3	2	0	1	2	1	1	3	3	1	2	2	2	9	8	5
1238	3	3	3	0	1	1	2	2	2	3	1	2	1	0	3	1	0	3	2	2	2	3	13	10	7
1239	1	0	2	1	1	1	2	3	0	1	1	3	0	0	3	0	3	3	1	3	0	0	6	4	3
1240	2	3	1	1	2	0	1	2	0	2	3	0	2	3	2	1	1	0	1	1	0	2	10	7	2
1241	0	1	3	3	0	1	2	1	0	3	3	0	2	1	0	0	2	3	2	0	1	1	9	9	4
1242	2	1	0	3	3	2	1	1	1	1	2	0	1	3	3	0	1	1	2	0	2	0	10	9	1
1243	0	2	2	1	0	3	2	1	1	3	1	1	1	2	0	0	1	1	0	2	0	2	8	4	3
1244	1	3	1	3	1	3	3	3	3	3	1	3	2	0	3	3	3	3	1	0	1	2	18	7	5
1245	1	3	2	1	2	1	2	2	0	2	1	2	1	3	3	2	3	3	1	0	1	1	11	6	4
1246	2	1	1	2	2	1	2	3	1	3	1	0	3	0	0	1	1	0	3	3	0	2	13	5	2
1247	3	3	2	2	0	1	3	0	0	0	3	3	2	2	3	1	2	1	3	2	3	3	14	8	5
1248	0	2	1	3	0	3	0	3	3	0	2	2	2	3	1	1	3	3	3	1	2	1	14	8	4
1249	0	2	3	2	2	1	0	1	2	2	1	3	3	0	1	1	1	3	1	3	1	1	10	10	4
1250	1	3	3	1	2	3	2	3	1	3	0	0	1	0	1	0	1	2	0	3	1	1	12	7	3
1251	1	1	0	0	1	3	0	3	2	1	0	2	3	0	2	1	0	2	0	2	1	2	11	4	4
1252	1	2	2	1	1	0	3	0	1	2	2	3	2	3	0	0	0	1	3	3	1	1	6	7	2
1253	3	2	1	1	0	1	2	0	2	1	0	0	1	0	0	2	2	3	2	1	2	1	8	5	4
1254	3	2	1	3	0	3	1	2	1	1	3	0	2	0	0	2	2	3	3	1	2	3	18	7	7
1255	0	2	0	0	0	1	3	0	1	1	0	3	3	3	0	2	1	2	3	3	3	1	6	4	3
1256	1	0	1	2	0	2	0	2	1	3	1	0	2	3	3	1	2	2	1	2	3	0	9	6	2
1257	2	0	0	2	1	0	3	2	1	1	0	1	3	0	0	3	2	0	3	3	0	3	11	2	3
1258	0	3	2	3	0	1	1	3	1	0	2	3	3	1	1	0	3	2	0	0	2	3	15	7	5
1259	2	2	1	3	3	1	3	0	0	1	0	2	1	2	0	1	0	1	3	2	0	1	9	5	2
1260	1	1	1	1	1	2	1	1	0	1	0	0	2	2	3	0	2	0	0	0	3	1	8	6	1
1261	0	0	0	1	2	3	3	2	1	2	2	3	2	1	2	1	3	1	3	0	2	3	8	7	4
1262	3	2	1	2	2	1	1	2	2	2	0	0	3	2	1	3	3	0	3	2	1	3	13	6	3
1263	3	3	0	2	1	0	0	0	3	1	2	3	1	1	2	2	3	1	1	3	0	3	11	6	5
1264	2	3	0	0	2	1	3	3	1	2	0	0	2	1	2	3	0	2	0	2	3	1	12	6	3
1265	2	3	1	2	1	2	1	3	0	2	3	1	3	1	2	3	2	1	1	3	3	2	16	10	3
1266	1	2	3	2	0	2	3	1	1	3	1	0	0	0	1	1	2	3	2	2	0	2	8	6	5
1267	0	2	3	3	1	3	1	0	0	2	0	2	2	3	3	3	0	1	0	0	2	3	11	8	5
1268	3	1	3	3	2	2	3	0	2	3	1	0	3	1	0	3	2	3	1	0	1	2	14	10	6
1269	2	1	1	2	3	0	3	2	0	1	2	2	3	3	2	1	1	1	3	2	0	1	10	6	2
1270	0	2	2	1	0	3	3	3	3	3	3	2	2	0	3	2	1	3	1	2	1	2	13	11	5
1271	3	0	3	2	1	0	3	2	1	2	2	0	1	1	2	0	2	2	3	1	0	2	8	7	4
1272	2	1	1	2	0	0	2	1	1	2	1	3	0	1	2	2	1	1	3	1	1	2	6	4	3
1273	3	2	2	2	0	1	0	0	2	3	0	2	2	3	3	3	3	2	3	1	3	1	12	7	3
1274	3	1	0	1	2	2	3	2	2	1	1	2	1	2	1	3	1	1	3	3	2	0	13	7	1
1275	0	2	3	0	0	3	3	2	2	2	0	0	1	3	2	0	3	2	1	1	2	1	8	7	3
1276	2	3	2	2	3	0	0	1	1	1	0	3	3	2	0	0	0	2	0	3	0	3	14	6	5
1277	2	0	1	0	0	2	1	3	2	2	0	2	3	1	3	3	0	1	0	2	0	2	11	3	3
1278	0	2	1	0	1	1	3	1	1	2	0	3	0	1	2	2	3	1	0	3	3	1	4	6	2
1279	2	2	1	1	1	0	3	0	0	3	0	1	0	2	0	0	2	2	0	1	0	1	5	2	3
1280	3	1	2	1	2	2	1	2	2	1	1	2	2	2	2	1	0	2	3	2	0	3	11	7	5
1281	1	0	1	1	0	0	3	3	1	1	2	3	1	1	2	3	2	2	2	1	0	1	6	4	3
1282	3	1	1	2	1	2	3	3	2	0	2	2	0	3	0	2	3	2	1	1	0	1	11	6	3
1283	0	2	1	0	1	3	0	2	3	1	1	0	1	3	0	1	0	2	0	0	1	3	8	7	5
1284	0	3	0	0	1	0	2	1	0	0	1	0	1	0	3	2	2	2	1	1	1	0	5	3	2
1285	1	3	0	0	2	2	2	0	2	3	1	0	1	1	0	0	0	3	3	2	0	0	7	5	3
1286	2	1	0	1	1	0	0	2	1	1	2	3	3	1	2	3	2	1	3	1	2	3	9	6	5
1287	3	1	3	0	0	3	0	1	2	3	2	3	3	3	3	3	0	1	1	3	1	1	11	8	2
1288	1	2	2	3	1	2	3	1	0	1	0	1	1	0	1	0	1	1	2	1	2	3	10	5	5
1289	1	2	2	1	2	1	2	3	1	0	1	3	3	3	3	2	2	1	3	2	2	2	13	8	3
1290	1	2	1	3	1	2	3	1	3	2	2	3	3	2	1	1	3	1	1	3	0	1	12	8	2
1291	2	1	3	1	1	1	2	3	0	1	1	1	2	0	0	3	0	2	1	0	3	2	11	9	4
1292	0	1	0	1	2	2	1	2	1	0	1	1	3	3	1	0	1	1	1	3	2	2	9	6	3
1293	2	3	0	3	2	1	0	2	1	2	3	2	2	1	0	0	2	0	3	0	1	2	13	7	2
1294	2	3	0	2	2	0	3	1	2	0	2	2	1	3	1	3	3	3	3	3	2	0	9	8	3
1295	1	2	2	3	1	0	0	2	0	2	1	2	2	0	2	3	0	1	0	0	1	1	11	5	2
1296	1	1	0	3	2	2	3	1	1	1	1	3	0	3	1	0	3	2	0	3	1	2	9	5	4
1297	1	0	1	2	0	3	0	0	2	3	1	0	3	0	0	0	3	1	1	2	3	3	11	7	4
1298	3	0	2	2	2	2	0	1	1	1	1	1	3	1	1	1	1	1	3	0	0	3	13	6	5
1299	0	3	1	1	3	2	1	2	0	3	1	3	1	0	3	1	2	2	2	1	2	1	10	7	3
1300	3	1	1	3	2	0	0	2	2	1	0	2	1	0	1	0	1	0	2	0	0	3	12	5	4
1301	2	3	2	1	3	2	3	3	1	2	0	2	0	2	1	1	3	2	0	2	0	3	15	6	5
1302	3	2	3	3	2	2	0	2	1	1	0	2	3	2	2	3	0	3	1	1	3	1	18	9	5
1303	2	3	1	2	0	1	3	2	1	2	1	2	0	2	3	1	1	0	1	0	3	1	10	6	1
1304	3	0	0	1	2	0	2	3	1	2	2	3	1	2	3	2	2	2	1	3	3	0	8	8	2
1305	3	1	2	1	0	1	0	2	2	1	0	3	1	2	2	1	3	3	2	1	3	1	10	8	4
1306	3	1	2	1	0	1	2	3	1	2	2	1	1	2	3	3	3	1	0	3	1	1	11	6	2
1307	3	3	3	1	3	2	1	2	1	2	0	0	3	0	0	1	1	3	2	2	1	1	18	8	4
1308	1	1	1	3	1	3	0	3	3	1	1	0	2	3	3	2	2	3	2	0	1	0	13	7	4
1309	0	2	0	1	1	0	0	0	1	1	2	0	1	3	1	2	2	1	3	3	0	0	4	4	1
1310	3	3	0	1	3	3	0	3	1	3	3	1	0	0	0	0	3	3	0	1	1	3	16	9	7
1311	2	2	1	2	3	0	3	3	0	1	3	2	1	3	3	1	1	1	2	0	2	3	13	12	4
1312	1	1	1	2	1	2	1	2	0	3	1	1	3	3	1	3	0	1	1	1	2	1	11	5	2
1313	3	1	2	3	1	3	1	1	1	0	1	3	1	0	2	2	0	3	2	3	1	1	15	6	4
1314	0	2	0	3	1	1	3	0	0	2	3	1	1	1	3	2	3	3	0	2	1	2	8	5	6
1315	1	1	2	0	3	1	2	2	0	0	0	2	2	1	1	0	3	2	2	0	2	3	7	7	6
1316	1	0	2	3	2	3	1	1	3	3	1	1	3	2	3	3	0	3	1	0	0	0	14	8	3
1317	0	1	0	0	3	0	3	3	1	2	1	2	2	3	3	2	1	0	0	2	0	3	7	5	3
1318	1	0	1	2	0	2	2	1	1	1	1	0	2	1	1	2	1	1	0	2	3	1	8	6	2
1319	0	1	1	2	2	3	0	1	1	0	3	3	3	3	1	3	3	0	3	2	0	3	11	8	4
1320	1	2	1	2	3	2	0	1	0	3	1	2	0	2	3	0	1	3	3	0	0	3	8	5	6
1321	3	3	3	1	2	2	1	3	2	3	1	1	2	0	2	0	2	3	3	0	2	3	16	10	8
1322	0	3	3	0	1	3	3	1	2	2	0	3	1	3	3	2	3	3	1	0	3	2	11	9	6
1323	1	2	1	0	1	0	2	2	0	3	2	2	3	3	2	1	3	0	3	2	0	2	8	4	2
1324	0	2	2	1	0	1	1	2	2	2	1	3	3	2	0	3	2	2	0	3	1	2	10	6	4
1325	2	2	1	3	3	2	1	0	3	1	1	3	2	1	3	3	1	2	2	3	1	1	11	9	3
1326	2	1	1	2	1	3	2	0	1	1	1	3	2	0	3	2	1	1	0	2	0	1	10	4	2
1327	0	1	2	1	1	0	0	1	2	2	0	2	0	1	0	2	0	3	2	1	0	1	3	5	4
1328	3	0	2	1	2	2	1	2	0	3	2	0	1	1	1	0	2	1	1	2	0	3	9	6	4
1329	2	2	3	1	0	2	2	2	1	3	2	2	1	3	3	2	3	3	2	0	1	0	10	7	5
1330	3	2	2	2	2	1	0	3	2	3	3	2	0	1	3	3	0	3	0	3	1	2	12	10	5
1331	3	2	3	3	2	2	2	2	0	0	0	3	2	1	0	0	1	2	2	1	2	2	15	8	4
1332	1	3	2	2	3	1	2	1	1	3	1	2	3	0	3	2	0	3	2	2	1	3	12	8	6
1333	1	3	1	1	1	2	2	2	1	2	2	1	3	3	1	3	1	2	0	3	1	2	14	6	4
1334	1	2	1	0	1	3	1	2	1	3	0	2	0	3	0	0	1	0	3	3	1	1	8	4	1
1335	1	2	1	0	1	0	2	2	0	2	1	3	1	2	1	3	1	2	2	1	2	2	6	5	4
1336	2	3	3	1	2	3	0	1	1	2	2	1	3	2	2	0	2	3	2	1	3	2	14	11	5
1337	2	1	3	3	1	2	0	3	1	2	1	1	1	3	1	0	0	2	2	0	1	2	12	7	4
1338	2	3	3	3	1	1	3	0	0	2	0	0	2	1	2	1	3	1	1	1	1	3	11	5	4
1339	2	0	1	2	2	2	1	2	0	0	2	3	0	1	3	0	0	0	3	3	2	3	8	7	4
1340	2	2	2	0	0	3	0	3	2	3	2	1	1	3	0	3	3	0	3	1	1	3	12	7	3
1341	2	0	3	2	0	2	0	1	0	2	1	1	0	0	3	1	3	1	1	0	0	1	7	5	2
1342	3	0	0	3	2	1	1	1	1	2	2	3	1	1	2	2	2	2	2	2	3	2	9	8	4
1343	0	2	1	2	3	1	2	0	2	3	0	2	2	1	1	2	3	1	0	2	1	3	7	7	4
1344	1	0	3	2	1	2	1	2	1	2	0	0	3	3	2	0	3	3	3	3	1	1	10	6	4
1345	0	1	1	1	2	1	2	3	0	2	2	3	1	1	1	2	0	2	3	1	2	3	8	7	5
1346	3	1	3	2	3	3	3	3	3	0	2	2	1	1	2	3	0	3	3	3	1	2	18	12	7
1347	1	3	1	0	3	2	3	3	1	2	0	2	1	1	3	1	3	0	2	3	1	3	11	6	6
1348	3	3	2	1	1	3	0	2	2	0	1	3	2	2	0	0	3	2	3	3	0	3	14	6	5
1349	3	3	0	1	3	2	0	2	1	0	2	2	3	2	3	1	1	3	3	1	1	1	14	7	4
1350	1	1	0	1	2	1	3	2	2	3	3	0	1	0	1	1	1	3	3	1	1	3	7	8	6
1351	1	3	2	3	2	0	1	3	3	3	1	0	2	0	0	0	0	3	3	2	0	1	16	8	4
1352	3	1	2	3	1	2	0	3	1	0	3	3	1	3	0	2	3	2	3	0	0	3	15	7	7
1353	2	1	3	0	2	3	1	3	2	3	1	0	1	2	1	0	1	3	0	0	1	3	11	10	6
1354	3	2	1	2	3	1	3	2	2	1	0	1	2	2	2	2	3	1	0	0	2	0	12	8	1
1355	2	2	0	1	1	0	1	1	1	1	3	0	2	1	2	1	2	2	3	3	0	1	8	6	3
1356	3	2	1	3	1	1	2	0	0	1	2	0	1	0	3	1	2	0	1	1	3	3	12	7	4
1357	1	3	1	0	0	0	1	1	1	1	0	2	2	1	3	2	1	1	1	3	2	2	9	4	3
1358	2	3	1	3	0	2	2	0	2	0	1	1	2	0	3	3	2	1	2	0	2	3	12	6	4
1359	2	0	2	3	2	3	3	3	1	1	0	1	1	3	1	0	2	1	2	1	1	2	12	6	3
1360	3	0	1	1	1	1	0	1	0	1	1	2	2	2	1	1	2	2	0	3	0	0	9	3	2
1361	2	3	1	1	1	1	3	1	2	1	0	0	2	2	2	2	0	1	3	2	2	3	10	6	4
1362	2	0	1	2	1	1	2	1	0	3	1	1	0	3	2	2	3	0	1	3	0	1	6	3	1
1363	2	1	1	1	2	1	1	0	0	2	0	1	1	1	2	1	0	0	3	0	1	2	6	4	2
1364	3	0	0	3	0	0	3	1	2	0	1	0	1	2	1	3	1	2	3	2	1	0	9	4	2
1365	0	1	1	1	1	1	3	2	0	2	3	1	1	1	1	2	3	1	0	3	0	2	6	5	3
1366	3	2	2	2	2	3	0	1	1	0	2	0	2	1	0	2	1	2	2	1	1	3	16	8	5
1367	1	2	2	0	0	3	3	1	2	3	2	2	0	1	0	3	3	2	0	3	1	1	8	7	3
1368	2	3	1	3	3	3	1	1	1	3	0	2	2	2	2	2	0	2	1	2	2	3	15	8	7
1369	2	3	0	2	1	2	2	3	1	0	2	1	0	2	2	3	3	1	3	3	3	1	13	8	2
1370	2	1	1	1	1	3	0	1	1	2	0	1	3	3	1	0	0	3	3	0	2	0	12	5	3
1371	2	3	1	2	2	0	1	3	2	2	3	2	1	3	2	1	0	3	3	0	1	1	12	10	4
1372	1	3	1	0	2	3	1	3	0	2	3	2	2	0	1	2	2	1	1	0	1	3	14	7	4
1373	3	3	3	1	3	3	1	3	2	1	2	2	2	2	0	0	1	3	3	1	1	3	18	12	7
1374	3	1	2	2	1	2	0	1	0	2	0	2	1	2	0	0	3	1	0	3	2	2	13	5	3
1375	2	1	1	1	2	2	1	1	1	3	0	1	0	3	0	3	0	1	0	1	0	1	7	4	2
1376	1	1	2	2	1	2	1	1	2	1	0	0	2	2	3	1	2	1	0	3	2	3	9	7	5
1377	1	0	0	2	1	2	3	2	3	3	2	1	2	2	0	3	0	3	1	1	2	1	9	8	4
1378	2	1	1	2	1	2	1	1	2	1	1	0	0	1	1	0	0	2	2	2	2	2	8	7	4
1379	2	1	1	3	2	0	1	0	0	0	2	2	1	1	0	0	1	0	3	0	1	3	7	6	4
1380	1	1	0	0	1	1	2	1	1	1	1	0	1	1	2	0	3	0	3	0	1	2	5	4	2
1381	2	1	0	1	2	3	2	0	0	1	3	2	1	2	3	3	3	1	2	0	1	1	8	6	2
1382	0	2	1	2	1	1	1	0	1	0	0	2	1	2	3	2	1	0	0	0	2	0	6	5	0
1383	2	3	1	1	2	3	1	3	1	0	1	0	2	0	3	1	3	2	0	2	2	3	14	7	5
1384	1	2	2	1	1	1	1	2	0	0	1	1	3	1	3	0	3	2	3	3	2	2	10	6	4
1385	1	1	0	3	1	2	3	2	2	3	0	3	1	2	2	1	2	2	0	0	3	2	13	6	4
1386	2	3	1	0	2	1	1	2	3	3	0	2	1	0	0	3	1	1	2	1	0	0	9	6	1
1387	0	2	2	0	0	2	3	2	1	1	0	0	1	1	1	1	3	2	3	0	1	2	7	4	4
1388	1	1	2	0	3	2	1	3	0	2	3	3	2	3	3	2	2	2	3	0	0	3	9	8	5
1389	3	1	3	2	0	1	3	2	1	0	1	3	1	2	3	1	1	3	1	0	3	2	13	8	6
1390	1	1	2	2	1	2	2	2	2	3	0	2	3	1	0	1	1	2	1	2	2	2	11	7	4
1391	3	2	3	1	0	0	1	2	2	3	3	3	3	2	2	1	0	3	1	2	1	3	11	10	6
1392	1	3	2	0	1	3	0	1	2	0	0	3	0	0	1	3	3	0	0	1	2	3	8	7	4
1393	3	1	0	1	0	2	1	1	1	1	1	1	1	2	0	3	0	1	2	3	1	1	9	3	2
1394	1	0	2	2	2	2	1	3	1	3	1	0	3	0	2	3	3	1	1	2	1	3	12	7	4
1395	0	1	0	0	1	1	2	0	1	3	1	2	0	0	0	2	0	0	1	3	0	0	2	3	0
1396	3	2	1	2	2	3	2	3	3	1	2	0	0	2	0	0	3	1	2	3	1	3	13	11	4
1397	1	3	2	3	3	1	0	2	2	1	1	0	0	2	0	3	1	2	3	0	1	1	11	9	3
1398	1	0	0	3	0	2	3	2	3	3	0	2	0	3	0	1	1	3	0	3	1	1	8	4	4
1399	3	1	1	1	1	0	3	1	1	2	0	3	1	2	1	0	2	3	0	1	0	0	10	3	3
1400	3	2	1	0	1	0	1	0	3	2	1	1	2	0	0	0	1	1	3	2	1	3	7	9	5
1401	1	2	0	0	2	2	0	2	0	3	1	2	3	0	2	3	2	2	2	3	3	2	10	8	4
1402	1	3	2	3	1	1	1	2	2	2	2	3	1	3	1	0	0	1	1	2	2	2	15	9	3
1403	2	1	2	2	1	2	3	3	0	2	1	1	1	1	3	0	0	3	0	0	1	3	11	5	6
1404	2	1	0	1	0	3	3	3	3	0	3	0	1	2	0	1	1	1	0	2	0	2	12	7	3
1405	0	3	0	1	2	1	1	0	1	2	2	2	2	2	2	2	3	2	0	0	1	1	7	6	3
1406	2	1	2	0	1	0	3	3	2	1	0	2	2	0	2	0	0	1	3	2	3	3	8	9	4
1407	0	2	2	2	1	1	0	0	0	0	1	2	2	0	1	0	2	1	2	3	3	2	7	7	3
1408	0	2	0	2	0	3	1	0	2	1	1	1	2	3	2	3	2	1	1	2	1	1	9	4	2
1409	0	0	0	0	1	0	1	0	0	3	0	3	0	1	2	1	3	1	0	2	0	0	0	1	1
1410	0	3	1	2	1	0	1	3	2	1	3	3	0	1	0	1	2	1	1	0	1	0	9	8	1
1411	3	2	1	1	1	2	2	3	3	1	2	3	1	2	1	1	0	0	0	1	0	3	12	7	4
1412	0	3	1	3	1	2	1	1	2	1	1	0	2	0	0	3	2	1	1	3	0	2	11	5	3
1413	1	1	0	3	1	2	3	3	0	0	2	0	0	3	0	0	1	1	0	2	2	2	11	5	3
1414	2	2	3	2	1	2	3	0	1	0	1	0	1	0	1	2	0	2	1	1	0	2	9	7	4
1415	3	1	1	1	1	0	1	3	3	1	0	1	2	3	0	2	0	3	2	1	3	2	11	8	6
1416	3	3	0	1	2	1	2	0	1	3	1	0	0	2	3	2	3	3	3	1	0	2	9	4	5
1417	0	3	1	3	1	0	2	2	1	2	0	0	3	3	3	0	0	0	1	3	1	2	11	4	2
1418	0	3	1	1	1	1	2	3	0	2	2	0	2	3	0	1	1	1	3	3	1	0	10	5	1
1419	3	2	2	2	1	1	1	2	3	0	1	1	2	0	1	3	2	3	1	0	0	2	13	9	6
1420	3	3	3	0	2	0	0	1	3	3	2	3	3	0	3	1	0	3	2	1	2	2	14	12	5
1421	3	2	1	1	2	2	0	1	3	3	1	0	3	2	1	1	2	3	3	3	1	1	14	9	4
1422	2	0	0	1	1	1	1	1	0	1	1	0	0	2	2	0	3	0	2	1	0	1	5	2	1

## Sheet: IRMA_SF_Items
ID	IRMA1	IRMA2	IRMA3	IRMA4	IRMA5	IRMA6	IRMA7	IRMA8	IRMA9	IRMA10	IRMA11	IRMA12	IRMA13	IRMA14	IRMA15	IRMA16	IRMA17	IRMA18	IRMA19	IRMA20	IRMA_TOTAL
1001	2	3	1	4	3	2	2	2	5	1	2	2	3	2	2	1	1	1	1	4	2.2
1002	2	2	2	2	1	1	1	2	1	3	2	2	1	2	2	3	1	3	1	3	1.85
1003	2	4	4	4	3	2	2	3	5	4	5	1	1	4	3	3	4	2	4	5	3.25
1004	1	2	3	1	3	2	3	1	2	1	2	2	1	3	1	1	2	1	2	1	1.75
1005	4	5	5	2	2	5	4	5	3	5	4	2	4	4	3	5	5	4	1	3	3.75
1006	3	2	4	3	2	3	2	4	2	2	5	4	4	3	4	3	3	5	2	1	3.05
1007	5	3	4	3	5	5	5	5	5	2	5	2	5	3	2	5	4	2	1	2	3.65
1008	2	4	4	1	2	2	4	2	3	3	4	5	4	4	4	3	5	3	4	3	3.3
1009	3	2	4	2	3	1	2	2	4	5	2	3	3	4	3	1	2	2	3	1	2.6
1010	2	5	5	4	5	4	1	3	1	1	2	3	4	4	3	4	2	4	2	1	3
1011	2	4	2	2	2	3	5	2	4	1	2	1	3	1	3	2	2	4	3	2	2.5
1012	2	2	3	4	1	2	3	3	5	5	4	3	4	4	3	4	3	3	3	2	3.15
1013	4	2	4	4	4	2	2	1	4	5	3	1	5	5	2	2	3	2	1	2	2.9
1014	2	3	4	5	5	5	3	4	2	2	2	4	5	2	1	4	3	4	2	1	3.15
1015	1	2	1	2	1	2	1	5	2	2	4	3	3	3	3	3	2	3	1	2	2.3
1016	2	4	2	4	1	2	4	1	4	4	3	2	2	3	2	2	3	2	1	1	2.45
1017	5	1	2	3	3	4	2	5	2	3	2	5	1	2	5	2	4	5	5	2	3.15
1018	1	1	1	2	1	2	2	1	3	1	1	1	1	2	1	2	1	1	1	2	1.4
1019	5	1	2	2	2	3	2	3	3	3	1	2	2	3	4	2	1	3	2	4	2.5
1020	4	2	2	2	2	5	2	2	2	2	3	2	5	1	1	4	1	1	3	2	2.4
1021	3	2	1	2	2	4	2	3	1	3	2	3	1	2	2	1	2	4	2	1	2.15
1022	5	1	3	4	3	5	1	4	3	2	4	2	3	2	4	2	1	3	3	2	2.85
1023	2	2	1	2	3	3	3	2	4	4	2	5	3	4	2	1	5	4	4	1	2.85
1024	2	3	3	4	1	2	1	3	1	5	3	5	1	2	2	3	5	3	4	3	2.8
1025	1	1	4	3	4	3	2	2	4	4	2	2	1	3	1	3	4	3	5	3	2.75
1026	3	2	3	1	2	1	2	1	1	4	2	3	1	1	1	2	2	3	2	1	1.9
1027	3	2	1	2	2	1	3	2	2	2	2	1	5	5	2	5	2	2	4	1	2.45
1028	5	3	4	5	3	1	2	1	2	3	2	2	3	3	4	4	4	5	4	2	3.1
1029	2	5	4	5	2	5	5	4	2	5	5	4	1	5	2	3	4	4	4	5	3.8
1030	3	1	3	4	1	3	2	2	2	2	1	5	3	2	2	2	2	2	4	3	2.45
1031	2	2	3	4	1	2	2	5	4	3	4	2	5	1	1	3	2	3	2	2	2.65
1032	4	3	1	5	5	5	5	4	3	2	2	3	5	2	5	3	4	1	4	3	3.45
1033	5	2	2	1	1	2	3	2	3	1	4	4	1	2	1	4	4	5	3	1	2.55
1034	4	2	2	4	1	4	3	4	2	5	5	4	3	3	2	1	2	3	1	3	2.9
1035	1	1	2	3	1	1	1	1	1	1	3	1	1	2	3	3	1	2	1	1	1.55
1036	2	3	3	2	2	1	4	2	3	1	2	5	3	4	1	1	2	2	3	2	2.4
1037	2	1	1	1	2	2	2	2	1	3	3	2	1	2	2	4	1	1	1	1	1.75
1038	5	5	1	5	5	5	4	4	3	2	4	5	1	2	3	4	5	3	5	4	3.75
1039	5	5	1	4	5	5	3	5	1	3	3	3	5	3	2	3	3	5	2	3	3.45
1040	3	3	3	3	1	4	3	4	5	3	3	3	1	1	2	1	2	2	1	2	2.5
1041	5	2	2	2	1	1	3	2	3	2	1	1	2	4	1	4	3	1	1	1	2.1
1042	5	3	5	4	1	2	5	1	3	2	3	2	5	4	5	4	5	2	4	3	3.4
1043	2	2	4	3	3	3	1	3	1	2	3	5	1	2	1	2	3	3	1	2	2.35
1044	4	2	1	1	4	3	3	2	2	4	1	3	1	1	3	2	3	2	2	2	2.3
1045	4	3	2	4	3	1	5	3	4	4	2	2	2	2	4	3	1	3	1	5	2.9
1046	3	3	3	2	2	3	2	3	3	3	2	1	2	3	2	3	1	4	4	3	2.6
1047	1	1	1	3	1	2	3	1	2	1	1	1	1	1	1	2	3	1	2	2	1.55
1048	3	3	4	3	1	4	5	3	3	2	2	2	3	5	3	2	2	3	3	4	3
1049	2	2	2	1	1	1	1	1	2	3	3	2	3	1	4	2	2	2	3	1	1.95
1050	5	1	3	2	1	2	1	3	5	2	2	4	5	2	3	5	2	3	3	2	2.8
1051	4	5	3	2	2	1	4	4	2	2	1	2	3	2	2	1	4	4	1	2	2.55
1052	4	4	3	5	4	4	3	5	1	2	4	5	3	2	2	4	3	3	3	2	3.3
1053	5	4	4	2	2	4	1	3	3	4	2	2	5	3	1	2	5	1	2	2	2.85
1054	1	3	2	2	1	2	1	3	1	2	1	2	1	1	1	1	1	2	1	3	1.6
1055	2	3	1	3	2	5	4	2	3	1	2	1	2	2	3	3	3	3	4	1	2.5
1056	2	3	3	2	2	2	1	1	1	1	2	5	1	2	1	1	1	2	1	2	1.8
1057	5	2	5	2	5	3	1	1	1	3	5	2	4	3	5	5	4	3	4	3	3.3
1058	3	1	1	1	2	2	2	2	1	3	2	2	2	1	1	2	2	2	2	4	1.9
1059	3	3	3	5	1	4	3	1	2	3	4	2	3	4	3	4	4	2	1	4	2.95
1060	1	1	2	3	3	3	1	2	4	4	3	3	3	2	2	4	3	1	2	5	2.6
1061	5	2	4	5	1	3	3	3	5	3	1	1	1	4	5	3	5	5	4	3	3.3
1062	2	2	2	2	2	5	2	2	2	1	2	1	1	2	1	2	1	1	3	5	2.05
1063	4	1	2	1	2	2	2	3	1	1	3	3	2	2	2	2	2	3	3	3	2.2
1064	4	4	3	3	3	3	3	5	4	5	3	5	3	5	1	1	3	4	2	1	3.25
1065	1	2	3	2	3	5	4	2	2	2	2	1	3	2	4	4	1	4	1	1	2.45
1066	3	2	2	2	2	3	1	3	2	1	3	3	2	1	4	3	1	3	3	2	2.3
1067	1	3	4	4	2	4	2	5	1	2	3	2	4	3	1	3	3	2	1	5	2.75
1068	4	2	2	2	3	4	2	3	2	2	4	2	2	3	1	2	4	2	1	3	2.5
1069	1	2	5	2	1	2	2	1	4	5	2	2	3	2	1	1	1	1	4	2	2.2
1070	1	1	1	2	1	3	1	3	3	2	2	3	1	3	1	1	1	1	1	2	1.7
1071	3	4	1	2	4	3	2	2	3	3	1	5	4	4	2	4	4	5	2	3	3.05
1072	3	4	1	1	5	1	1	4	2	4	5	2	2	2	2	2	2	5	5	4	2.85
1073	3	4	3	2	1	3	2	1	4	2	1	4	4	2	2	2	3	1	2	3	2.45
1074	4	1	3	4	1	2	1	3	3	1	2	3	1	1	1	2	4	2	2	1	2.1
1075	1	1	1	1	1	1	3	1	2	1	4	1	2	1	1	1	1	2	1	1	1.4
1076	1	1	1	1	1	1	1	1	1	1	1	1	1	1	1	1	1	1	1	1	1
1077	4	1	1	3	2	3	3	2	3	2	4	3	3	1	1	1	2	4	3	2	2.4
1078	4	2	2	4	2	4	2	5	2	3	1	2	4	4	1	2	2	1	2	4	2.65
1079	1	2	3	2	3	4	1	3	1	2	1	1	2	2	4	3	4	1	2	1	2.15
1080	2	2	2	3	2	2	2	1	2	1	4	2	4	3	1	5	3	2	2	5	2.5
1081	1	3	4	4	2	1	5	2	3	3	5	1	5	4	3	4	5	2	3	2	3.1
1082	5	4	3	3	4	4	5	2	2	3	2	3	2	2	3	4	4	3	3	2	3.15
1083	3	5	3	4	3	2	5	2	4	2	2	4	4	5	5	4	3	4	3	3	3.5
1084	3	3	5	2	5	1	2	2	3	2	5	4	3	3	5	4	2	3	2	2	3.05
1085	2	1	1	1	1	2	3	3	1	1	1	2	1	1	2	1	1	3	2	1	1.55
1086	1	1	2	2	4	2	4	2	3	4	3	3	5	2	3	4	1	1	5	3	2.75
1087	4	2	2	3	4	2	3	5	5	4	4	3	2	3	5	3	4	5	2	1	3.3
1088	1	4	3	2	5	1	4	4	5	5	5	5	4	2	2	2	5	2	5	2	3.4
1089	3	5	4	2	4	3	1	4	5	1	3	3	2	5	2	4	3	3	4	2	3.15
1090	1	1	1	1	2	1	2	1	2	4	1	2	2	2	1	1	1	1	2	2	1.55
1091	5	3	2	4	4	2	1	2	4	4	2	2	4	5	3	3	2	2	3	2	2.95
1092	4	3	4	2	4	2	3	3	2	5	3	3	4	4	3	4	1	1	3	4	3.1
1093	4	3	3	3	5	4	5	5	2	2	2	5	1	2	5	4	2	3	3	5	3.4
1094	4	2	2	4	3	3	2	4	2	1	3	2	3	1	3	2	3	1	2	3	2.5
1095	4	2	2	3	4	2	2	2	5	3	1	4	4	1	5	4	2	2	2	4	2.9
1096	2	2	1	3	3	3	2	3	3	2	3	2	3	1	3	5	4	1	2	1	2.45
1097	1	5	3	3	1	5	3	3	2	2	4	5	4	3	4	2	2	5	2	1	3
1098	2	5	1	3	4	2	1	2	1	2	3	2	2	3	3	4	1	4	2	2	2.45
1099	3	4	3	4	3	5	4	5	2	4	2	3	5	1	4	3	5	5	4	4	3.65
1100	3	2	5	3	2	2	4	3	3	2	2	3	3	2	3	1	4	4	1	2	2.7
1101	2	3	4	3	3	5	3	3	1	1	1	5	3	3	5	3	3	2	2	4	2.95
1102	2	2	2	3	3	4	3	5	3	3	4	5	5	5	3	3	4	3	4	2	3.4
1103	1	1	1	1	1	1	1	4	1	1	3	1	1	1	1	1	1	2	2	3	1.45
1104	5	5	4	3	5	3	5	4	5	3	3	5	5	4	5	3	3	5	3	5	4.15
1105	5	3	1	4	4	5	4	2	5	4	5	5	3	5	3	3	5	5	4	3	3.9
1106	2	2	1	3	4	2	1	3	1	2	3	1	4	3	2	1	1	1	2	1	2
1107	1	2	3	1	2	1	4	4	1	5	1	3	4	3	1	4	4	2	2	2	2.5
1108	1	2	2	3	2	2	1	1	1	1	3	3	3	3	3	2	2	2	2	3	2.1
1109	2	1	4	5	5	5	5	4	5	5	2	3	3	4	5	3	3	5	3	3	3.75
1110	3	5	4	4	1	2	4	3	5	5	4	2	5	3	2	3	1	1	2	4	3.15
1111	5	3	3	5	4	3	2	2	5	3	3	4	5	3	4	2	1	5	1	5	3.4
1112	2	2	2	1	2	1	1	1	2	1	2	1	1	1	1	1	1	2	1	1	1.35
1113	1	2	1	3	3	3	2	1	3	3	1	2	2	1	4	3	2	2	1	5	2.25
1114	5	5	3	4	3	1	3	4	3	5	2	3	2	4	2	4	4	5	5	5	3.6
1115	2	2	2	2	4	3	2	5	4	5	2	2	1	2	4	2	3	1	2	1	2.55
1116	4	3	5	3	2	2	3	2	1	2	2	1	3	1	2	3	2	3	2	2	2.4
1117	5	2	1	4	3	2	5	2	5	2	2	2	2	2	2	1	2	2	3	5	2.7
1118	2	2	3	2	4	1	1	1	1	3	2	1	2	1	1	2	3	2	1	1	1.8
1119	3	2	1	3	4	2	2	5	4	5	2	2	2	4	2	5	5	2	2	2	2.95
1120	3	4	3	1	1	3	3	1	2	3	1	3	1	3	2	2	3	3	1	2	2.25
1121	2	3	3	2	4	1	2	2	1	4	3	2	3	2	3	1	2	2	3	4	2.45
1122	3	2	4	2	5	1	5	4	3	2	5	2	3	5	4	2	5	2	1	1	3.05
1123	1	2	1	1	3	2	1	3	1	5	3	3	2	1	1	1	1	2	3	1	1.9
1124	3	2	1	1	1	2	1	1	1	1	3	1	1	2	2	1	1	1	1	1	1.4
1125	5	3	3	3	1	3	2	3	5	2	5	2	2	3	4	3	4	1	2	5	3.05
1126	1	4	2	3	2	1	4	1	1	3	1	1	2	3	1	3	3	3	1	3	2.15
1127	4	3	2	1	4	5	3	1	3	3	3	3	4	2	5	3	1	2	1	4	2.85
1128	5	3	1	2	3	5	5	5	5	2	2	4	3	3	5	5	5	5	4	5	3.85
1129	3	2	5	1	2	3	5	5	3	2	2	4	2	3	1	1	3	1	1	3	2.6
1130	3	5	2	4	3	3	3	5	3	2	5	2	2	1	5	2	2	5	2	3	3.1
1131	2	4	5	1	4	3	4	3	4	1	4	1	3	2	5	3	3	3	3	5	3.15
1132	2	3	1	1	2	4	1	1	1	3	2	3	1	1	2	3	3	1	2	5	2.1
1133	2	3	3	2	4	4	2	3	2	3	2	4	1	1	2	2	3	2	3	4	2.6
1134	2	4	3	5	5	4	3	2	5	5	1	2	1	3	2	3	4	5	1	3	3.15
1135	5	3	4	3	2	3	4	4	4	3	4	4	3	3	1	2	4	2	5	5	3.4
1136	3	1	3	4	3	2	4	2	1	5	4	2	2	2	1	1	3	4	3	1	2.55
1137	5	2	3	4	4	4	3	4	2	2	5	5	3	5	5	1	5	2	5	2	3.55
1138	1	2	3	1	2	2	1	2	3	3	3	1	3	1	3	4	1	1	2	2	2.05
1139	3	1	5	2	1	1	3	1	1	2	3	3	2	3	4	1	2	3	1	2	2.2
1140	3	1	2	2	3	5	1	1	1	3	1	3	2	2	1	4	2	5	1	2	2.25
1141	3	2	5	4	1	4	4	4	2	5	2	3	3	4	4	1	4	5	5	5	3.5
1142	2	3	3	4	2	5	4	3	1	1	3	5	3	2	1	4	4	2	5	2	2.95
1143	2	3	3	4	3	1	3	5	4	4	2	3	4	3	1	4	2	1	4	1	2.85
1144	5	3	2	5	5	4	2	5	1	3	4	5	3	1	4	4	5	5	4	2	3.6
1145	1	1	4	1	1	3	2	1	2	2	3	5	2	2	5	4	2	3	4	1	2.45
1146	4	5	3	2	2	3	3	3	1	3	3	2	2	2	5	3	4	2	2	4	2.9
1147	5	3	2	3	5	3	3	2	5	4	3	4	4	4	4	5	5	4	4	2	3.7
1148	3	1	1	4	3	2	3	4	2	2	2	1	1	2	1	1	1	2	1	4	2.05
1149	4	3	5	5	3	4	3	2	2	3	3	3	3	1	1	3	2	4	3	4	3.05
1150	3	2	4	5	5	4	3	2	3	5	2	3	2	4	2	1	5	3	3	3	3.2
1151	2	2	2	2	3	4	3	2	3	4	1	1	3	4	2	4	3	5	3	1	2.7
1152	2	1	2	2	1	2	1	2	1	2	1	3	2	2	1	2	1	2	1	2	1.65
1153	2	3	1	2	2	5	3	3	4	1	3	1	2	2	1	2	1	5	1	1	2.25
1154	1	3	4	2	3	3	2	4	2	2	3	2	5	4	2	2	2	2	3	4	2.75
1155	2	1	1	1	1	2	2	2	1	3	1	3	1	2	2	1	2	2	1	1	1.6
1156	1	2	4	4	4	4	4	4	3	2	5	1	3	4	3	2	2	5	2	5	3.2
1157	4	4	4	3	2	3	5	3	2	5	5	5	4	2	5	2	5	5	3	5	3.8
1158	4	3	2	1	4	1	3	1	1	3	1	3	1	3	2	2	2	1	2	3	2.15
1159	3	3	3	3	2	2	2	5	1	5	2	3	4	2	4	5	1	5	4	3	3.1
1160	1	1	4	1	3	2	1	2	3	3	2	3	1	4	3	2	2	2	1	2	2.15
1161	2	1	2	1	1	1	1	1	3	1	2	1	2	1	1	2	2	2	3	2	1.6
1162	2	1	1	2	1	3	1	1	1	2	1	3	1	1	1	1	1	2	2	2	1.5
1163	1	1	2	1	2	1	2	2	2	3	2	1	2	1	1	1	1	1	1	1	1.45
1164	3	3	1	1	3	2	3	2	2	3	4	1	3	3	1	2	1	1	3	3	2.25
1165	2	2	5	4	4	2	5	5	3	5	5	4	4	1	2	1	2	3	4	5	3.4
1166	1	3	1	1	1	1	3	1	1	2	1	1	1	1	1	1	1	1	2	1	1.3
1167	5	3	1	2	1	3	1	4	4	3	1	2	2	3	3	2	2	4	2	1	2.45
1168	2	4	1	3	4	3	1	2	2	2	5	3	2	5	3	2	2	2	1	4	2.65
1169	2	3	1	3	1	4	2	1	2	2	2	1	1	2	2	1	2	1	1	1	1.75
1170	1	4	2	2	3	3	3	3	2	2	4	2	3	3	5	3	1	4	1	4	2.75
1171	3	5	3	4	2	3	2	1	1	3	3	5	3	5	2	3	2	3	5	2	3
1172	3	4	2	3	1	5	4	1	3	5	3	4	2	3	5	5	2	1	2	2	3
1173	2	5	3	2	1	2	5	2	1	1	2	4	5	3	1	1	1	1	1	2	2.25
1174	1	2	1	1	2	2	1	1	3	2	1	1	1	1	2	1	1	1	2	2	1.45
1175	1	2	1	2	2	1	3	3	2	3	5	5	1	3	2	1	3	2	3	5	2.5
1176	3	3	3	2	2	2	5	4	4	2	2	2	2	2	3	2	1	3	1	2	2.5
1177	2	3	1	3	1	1	4	2	4	5	2	4	3	2	4	3	3	5	2	3	2.85
1178	5	2	1	2	1	2	2	2	1	2	1	2	3	4	1	2	2	3	1	1	2
1179	3	1	2	3	3	4	1	4	1	5	3	2	2	1	1	1	1	3	4	3	2.4
1180	5	3	4	4	2	2	3	5	4	2	5	1	5	3	4	5	3	2	4	2	3.4
1181	4	2	1	3	2	1	5	3	2	3	4	1	3	4	2	3	1	4	2	4	2.7
1182	1	4	4	2	3	1	5	3	3	3	3	4	3	4	2	1	4	2	2	2	2.8
1183	5	1	2	2	3	4	5	2	3	4	3	1	3	4	4	2	2	2	2	1	2.75
1184	4	1	1	2	2	3	2	4	4	2	2	3	2	2	2	2	1	2	2	3	2.3
1185	4	4	3	4	1	3	5	4	3	4	5	3	4	5	3	2	2	2	3	3	3.35
1186	4	3	5	2	4	2	3	4	2	2	3	3	4	5	1	3	4	5	1	2	3.1
1187	3	3	1	2	3	4	3	3	2	3	1	2	2	5	1	5	2	3	2	5	2.75
1188	3	2	2	5	3	3	3	2	2	4	4	2	4	4	4	1	2	4	3	2	2.95
1189	1	2	1	1	1	1	1	2	1	1	1	1	1	1	2	1	1	1	1	1	1.15
1190	2	2	2	3	2	1	3	2	2	2	3	2	1	3	1	3	1	3	4	2	2.2
1191	1	2	1	1	3	1	2	2	3	2	1	2	1	1	1	2	1	1	1	1	1.5
1192	3	2	1	1	4	2	1	3	1	2	1	2	1	1	1	3	4	2	2	2	1.95
1193	2	4	5	2	2	3	4	3	3	4	5	1	5	3	3	4	2	2	2	2	3.05
1194	1	2	2	1	5	2	2	1	3	2	3	2	1	4	3	2	1	5	4	2	2.4
1195	3	2	1	2	3	1	1	2	3	2	1	1	1	1	1	3	1	2	3	3	1.85
1196	2	1	2	2	5	4	1	4	3	4	4	4	4	2	5	5	5	1	3	5	3.3
1197	4	5	2	4	1	3	2	4	4	2	3	1	3	2	2	5	2	4	2	4	2.95
1198	5	4	2	4	2	5	3	4	1	3	4	4	1	4	1	3	3	1	4	1	2.95
1199	4	2	1	4	4	3	2	1	4	3	3	4	3	1	5	3	3	4	1	3	2.9
1200	2	1	5	2	1	2	1	3	1	2	2	2	2	2	1	1	2	2	2	1	1.85
1201	1	1	3	3	2	4	2	4	2	3	2	2	4	1	5	3	2	3	3	1	2.55
1202	2	5	1	3	2	3	1	2	5	1	3	3	2	3	2	1	4	3	4	1	2.55
1203	3	4	5	5	5	1	5	4	2	2	3	3	2	1	2	3	4	5	4	2	3.25
1204	5	5	5	4	2	3	2	5	3	3	5	5	4	3	4	4	1	5	3	3	3.7
1205	1	3	2	3	3	3	1	1	3	3	1	1	1	4	1	1	2	1	1	3	1.95
1206	1	1	2	2	1	2	2	4	1	5	3	2	1	3	2	2	2	4	3	3	2.3
1207	1	2	2	1	3	2	3	1	4	1	1	1	1	2	1	1	1	1	2	2	1.65
1208	2	2	1	2	2	1	1	1	4	3	5	1	4	2	1	1	3	3	1	1	2.05
1209	1	1	3	4	3	1	2	2	3	3	2	1	3	2	3	1	2	2	1	1	2.05
1210	2	5	1	4	5	2	3	3	3	4	2	3	2	1	2	3	2	3	3	2	2.75
1211	5	1	4	4	5	4	5	5	5	2	5	4	3	4	4	5	5	1	2	1	3.7
1212	2	3	5	3	5	5	5	3	3	5	4	5	5	4	5	3	5	2	3	4	3.95
1213	2	1	1	2	3	1	3	3	2	3	1	2	4	2	2	2	2	2	1	3	2.1
1214	1	5	2	3	4	4	4	5	2	3	2	2	2	3	3	4	3	1	2	3	2.9
1215	3	3	4	3	5	3	3	5	1	1	1	3	2	5	3	3	2	2	5	3	3
1216	2	1	2	2	2	1	2	2	2	1	1	1	4	1	4	1	1	1	1	1	1.65
1217	3	2	3	1	5	5	4	3	4	5	2	4	3	5	3	5	2	1	1	2	3.15
1218	3	3	1	2	1	4	1	3	2	2	4	1	1	1	3	3	2	4	5	1	2.35
1219	4	5	5	4	2	2	3	1	2	1	2	3	2	1	3	1	5	2	2	3	2.65
1220	2	1	3	3	4	3	1	2	2	2	3	5	3	4	3	4	1	3	2	4	2.75
1221	2	2	5	4	2	4	2	3	2	2	4	4	5	1	4	2	3	5	2	2	3
1222	1	1	1	2	4	2	2	1	2	1	2	1	2	1	1	1	1	1	1	1	1.45
1223	1	3	3	5	3	2	2	2	1	2	2	3	4	5	1	1	3	3	5	2	2.65
1224	2	3	4	3	2	3	4	2	1	2	2	3	2	3	2	4	1	4	5	3	2.75
1225	1	4	3	1	3	3	2	2	4	2	2	2	4	4	4	3	4	2	1	1	2.6
1226	4	5	1	3	4	5	4	4	5	2	1	1	3	2	2	2	5	2	2	3	3
1227	4	2	2	3	3	1	1	1	1	2	2	3	5	3	3	2	2	1	2	2	2.25
1228	3	4	2	1	3	1	1	3	2	3	4	2	2	1	2	3	2	1	4	1	2.25
1229	3	4	4	3	2	3	5	2	4	4	4	2	5	3	4	2	4	3	3	2	3.3
1230	2	4	1	4	1	2	4	2	5	5	3	4	4	2	4	1	2	4	3	4	3.05
1231	1	2	3	2	4	4	2	2	4	3	2	3	3	2	4	5	3	4	4	2	2.95
1232	2	3	3	3	3	3	1	4	3	5	2	2	2	3	5	1	1	1	1	2	2.5
1233	3	4	1	3	2	4	2	3	2	1	4	2	4	5	5	2	3	2	1	4	2.85
1234	5	1	3	3	5	3	4	4	5	5	4	4	4	4	1	2	2	3	4	3	3.45
1235	2	2	2	2	1	3	3	2	2	1	2	1	1	1	2	1	2	2	1	3	1.8
1236	3	2	2	4	2	3	3	2	2	3	3	2	1	2	3	5	3	3	4	1	2.65
1237	1	3	2	1	2	2	3	1	2	3	4	2	1	2	2	2	2	3	1	1	2
1238	1	1	4	2	1	2	4	1	3	1	1	2	1	5	5	4	2	3	4	2	2.45
1239	2	4	3	1	2	5	2	5	5	2	1	3	1	2	3	2	1	3	2	3	2.6
1240	2	3	2	4	5	5	4	2	2	3	3	3	4	2	5	5	5	2	4	5	3.5
1241	5	1	3	3	2	2	2	2	2	4	3	1	2	3	1	2	4	2	2	1	2.35
1242	2	3	3	3	4	1	2	4	1	5	2	5	3	3	5	4	5	3	3	4	3.25
1243	2	1	1	2	2	1	1	1	1	1	2	1	2	1	1	2	1	1	2	1	1.35
1244	3	2	2	3	2	4	1	2	3	4	4	3	2	1	2	5	4	4	3	1	2.75
1245	5	4	5	5	5	3	2	2	2	3	2	3	5	5	5	3	2	3	2	5	3.55
1246	3	2	4	2	5	2	2	3	4	4	3	2	2	5	2	3	2	2	2	2	2.8
1247	3	3	2	2	2	1	4	2	3	3	3	4	2	3	1	2	2	1	2	2	2.35
1248	4	4	2	4	2	4	3	3	2	2	2	1	4	5	1	2	4	5	5	2	3.05
1249	2	2	2	2	2	3	3	1	3	3	5	2	3	3	1	4	2	3	3	1	2.5
1250	2	4	3	3	3	5	3	1	4	4	3	2	3	4	5	3	1	3	5	3	3.2
1251	2	1	2	2	3	2	2	3	2	3	3	2	2	5	2	3	1	2	1	3	2.3
1252	2	5	1	4	2	1	4	2	1	2	4	5	1	3	2	4	1	2	5	3	2.7
1253	2	4	2	1	3	3	1	1	2	3	3	3	2	2	5	2	4	2	3	1	2.45
1254	3	5	4	5	2	4	4	5	3	3	2	2	2	2	3	3	5	3	3	2	3.25
1255	5	1	2	2	1	2	1	1	1	4	2	2	2	1	2	2	1	3	3	2	2
1256	2	4	3	3	2	2	3	3	3	5	4	2	3	2	2	1	3	4	1	2	2.7
1257	4	1	3	2	2	3	3	3	3	3	1	5	1	1	5	5	3	1	3	2	2.7
1258	5	5	3	3	1	1	5	2	5	2	4	3	4	2	5	4	2	5	4	4	3.45
1259	4	4	4	1	1	5	2	1	3	1	3	3	2	1	2	2	2	1	3	2	2.35
1260	1	2	2	2	1	2	2	1	2	1	1	3	3	1	2	2	2	1	1	1	1.65
1261	1	2	1	1	1	2	2	3	1	2	1	1	3	2	2	1	1	2	3	1	1.65
1262	2	1	3	5	4	5	4	4	2	2	2	3	1	1	5	1	5	2	2	2	2.8
1263	4	5	2	5	5	2	1	2	3	2	5	4	5	3	4	5	5	3	4	3	3.6
1264	5	2	1	3	4	1	3	3	5	2	2	3	3	4	4	4	4	4	2	1	3
1265	5	2	4	3	5	3	5	5	4	4	2	3	5	3	3	2	1	3	4	4	3.5
1266	5	3	4	5	3	5	5	5	5	5	2	2	5	4	4	4	5	2	3	5	4.05
1267	2	5	1	3	2	5	1	3	4	3	2	4	3	3	2	4	3	1	1	1	2.65
1268	3	5	2	3	2	2	5	4	2	3	3	5	5	3	5	2	3	5	2	3	3.35
1269	3	2	2	4	5	2	5	5	2	2	3	2	1	5	3	2	2	1	2	2	2.75
1270	5	5	2	3	4	3	1	3	4	2	2	3	3	4	3	4	5	3	5	4	3.4
1271	4	2	3	2	1	2	2	1	2	4	1	2	2	3	3	3	1	1	3	2	2.2
1272	3	3	5	2	3	2	1	2	2	5	2	5	2	1	1	1	3	1	4	3	2.55
1273	5	3	4	1	3	3	5	2	3	3	3	4	2	2	4	3	2	1	3	4	3
1274	5	3	5	3	2	1	4	3	5	4	5	2	2	3	3	4	1	5	1	3	3.2
1275	3	2	2	2	1	3	1	5	4	2	3	5	4	3	4	3	4	1	2	3	2.85
1276	2	5	4	5	5	2	5	1	2	2	5	3	2	3	4	3	1	2	3	1	3
1277	2	1	1	3	1	2	2	1	2	2	3	1	2	3	2	2	3	2	1	1	1.85
1278	2	4	3	2	2	2	1	2	1	5	5	3	4	2	4	3	1	2	4	3	2.75
1279	1	1	1	1	1	5	1	1	3	3	2	3	1	1	2	2	2	3	3	1	1.9
1280	4	3	3	3	4	2	5	4	2	5	4	3	3	3	2	3	3	4	4	4	3.4
1281	2	1	1	2	2	1	1	1	2	1	2	2	1	1	1	2	2	3	2	3	1.65
1282	1	4	1	1	2	3	2	3	3	2	1	3	2	2	2	4	1	1	2	1	2.05
1283	1	1	2	1	2	2	1	2	1	2	2	1	1	1	2	2	1	2	2	1	1.5
1284	1	3	1	2	1	1	1	1	1	1	1	1	1	1	1	1	1	1	1	1	1.15
1285	2	4	1	1	1	2	2	1	2	1	1	2	1	1	2	3	3	1	2	2	1.75
1286	3	3	4	4	4	3	4	3	5	2	5	2	2	3	3	4	3	3	4	2	3.3
1287	3	2	4	3	3	5	3	5	1	1	2	2	3	3	3	4	5	3	3	1	2.95
1288	2	2	2	3	3	2	4	4	1	3	5	3	2	2	2	2	5	1	5	3	2.8
1289	1	5	2	3	4	3	3	3	5	5	3	1	1	5	4	5	4	5	1	4	3.35
1290	4	3	2	3	3	3	2	4	3	3	2	3	2	5	3	2	1	5	4	3	3
1291	5	4	2	4	2	4	2	5	3	4	1	2	3	3	2	3	3	4	3	3	3.1
1292	2	1	2	1	5	1	4	2	2	1	2	3	2	1	4	4	1	2	2	1	2.15
1293	3	2	3	5	1	5	5	3	2	5	3	2	3	4	5	5	4	4	2	5	3.55
1294	1	3	5	5	1	2	3	2	4	1	1	3	5	3	3	5	2	2	3	2	2.8
1295	1	2	2	1	1	2	2	1	1	4	2	1	3	1	3	3	3	3	3	1	2
1296	4	2	3	5	3	5	2	3	1	4	1	2	2	5	2	5	2	2	5	5	3.15
1297	5	1	1	3	2	3	3	2	2	3	4	3	3	4	2	2	3	3	3	1	2.65
1298	4	3	4	4	3	1	4	4	2	3	5	2	2	2	5	5	3	3	3	4	3.3
1299	3	3	2	3	3	1	3	5	2	5	1	4	2	2	3	4	5	3	3	3	3
1300	5	3	2	2	4	4	1	2	2	4	4	2	4	5	3	4	2	5	4	3	3.25
1301	5	5	3	1	2	1	4	4	4	3	2	2	1	2	2	3	2	2	1	1	2.5
1302	5	4	4	4	3	4	3	5	2	5	5	5	4	4	3	2	5	3	3	3	3.8
1303	2	1	5	3	1	5	3	2	2	1	2	1	2	2	4	3	1	3	2	2	2.35
1304	3	2	4	5	3	5	2	4	2	1	3	3	2	1	2	2	2	2	4	4	2.8
1305	5	4	2	5	3	2	2	2	2	2	3	3	4	2	3	3	4	2	1	3	2.85
1306	3	2	2	1	4	1	2	2	2	2	4	2	5	2	1	1	2	1	3	2	2.2
1307	2	3	5	3	2	3	3	3	4	5	2	4	4	4	5	4	4	5	5	3	3.65
1308	3	3	2	4	3	3	3	4	5	3	4	2	3	2	1	3	4	2	3	3	3
1309	2	2	1	2	2	2	1	1	3	2	2	1	2	4	4	3	1	3	3	1	2.1
1310	4	2	5	4	4	4	3	3	4	4	5	3	5	3	4	3	5	2	3	4	3.7
1311	3	3	1	5	2	2	5	4	2	4	3	5	4	4	2	3	1	2	4	5	3.2
1312	1	2	3	2	1	3	4	3	2	1	1	3	2	4	2	2	3	3	1	2	2.25
1313	5	5	4	3	3	2	1	1	1	1	2	1	4	4	1	2	4	3	1	3	2.55
1314	5	5	2	1	3	2	3	2	3	1	2	2	4	1	4	3	2	2	2	3	2.6
1315	1	1	2	2	1	2	1	1	1	1	1	2	2	1	2	1	1	1	4	2	1.5
1316	2	4	2	2	1	2	4	2	2	3	3	1	4	3	1	5	5	4	4	3	2.85
1317	1	1	2	2	1	2	2	1	2	2	1	2	1	2	2	1	1	2	1	1	1.5
1318	1	1	2	3	4	1	3	1	5	2	1	1	1	1	3	2	5	2	2	2	2.15
1319	2	4	3	4	5	1	1	3	4	2	2	3	2	1	2	2	3	5	1	2	2.6
1320	3	2	1	2	3	3	2	1	1	1	3	1	2	1	2	1	1	1	2	2	1.75
1321	3	5	3	5	3	4	3	5	3	4	5	1	1	5	4	3	4	2	5	3	3.55
1322	2	4	2	3	4	2	3	4	1	2	5	5	1	1	1	2	2	3	1	3	2.55
1323	2	4	1	1	3	1	3	5	2	4	2	1	3	5	3	3	5	3	3	2	2.8
1324	2	1	2	1	1	1	1	1	2	2	1	1	1	1	3	1	1	1	1	2	1.35
1325	2	2	1	1	1	1	1	2	1	3	1	1	2	1	3	1	2	3	2	1	1.6
1326	1	2	2	1	2	4	4	1	1	2	3	2	4	3	1	3	1	2	5	3	2.35
1327	1	3	2	1	5	2	1	1	3	5	2	4	3	2	2	3	2	3	2	1	2.4
1328	2	3	3	2	2	3	3	4	3	2	5	3	1	1	3	2	5	3	1	2	2.65
1329	2	3	2	1	4	2	4	4	4	3	4	5	5	3	2	3	2	2	2	2	2.95
1330	3	2	1	3	2	2	1	2	4	3	1	3	2	3	3	5	1	4	2	4	2.55
1331	5	2	4	1	3	2	5	2	3	4	5	4	2	2	2	5	4	3	5	1	3.2
1332	5	4	5	3	2	3	2	5	4	2	2	2	5	2	3	3	4	5	3	5	3.45
1333	2	5	3	5	3	1	4	2	1	5	5	4	5	4	4	5	4	3	5	3	3.65
1334	1	2	2	1	1	1	1	2	2	2	2	3	4	2	2	1	2	2	1	1	1.75
1335	4	2	2	1	1	1	3	1	2	1	1	3	2	2	1	1	1	2	3	1	1.75
1336	4	3	5	3	3	1	5	3	1	4	5	5	4	2	4	4	4	5	3	2	3.5
1337	1	3	2	1	2	3	1	1	1	4	3	2	2	1	1	3	1	3	2	3	2
1338	1	2	2	2	1	1	2	4	1	4	2	2	1	1	1	1	3	1	1	2	1.75
1339	1	3	1	1	2	3	1	2	1	5	3	3	3	1	3	1	2	3	3	3	2.25
1340	1	1	2	2	1	1	3	2	4	1	1	1	2	1	1	1	2	2	2	2	1.65
1341	4	4	2	5	3	1	5	1	2	2	2	2	2	3	3	2	2	2	2	4	2.65
1342	3	4	1	1	1	2	3	5	2	5	1	5	1	4	1	5	1	3	3	3	2.7
1343	1	2	4	2	2	1	2	2	3	1	2	1	1	2	1	1	1	4	4	1	1.9
1344	5	2	1	3	3	3	4	3	4	3	3	5	4	3	5	5	3	2	1	4	3.3
1345	3	1	2	5	5	3	5	1	1	3	5	3	1	2	2	3	1	5	3	4	2.9
1346	5	2	2	5	5	4	5	5	2	3	5	4	3	4	4	5	2	3	5	5	3.9
1347	3	2	4	3	2	1	2	3	3	4	2	2	1	1	1	1	2	2	3	4	2.3
1348	2	2	2	1	4	1	3	1	2	1	1	2	2	1	2	1	2	4	1	2	1.85
1349	5	4	3	5	3	5	3	5	4	3	4	5	5	4	4	3	3	4	2	2	3.8
1350	3	2	3	4	2	1	2	2	2	4	3	4	1	4	2	1	3	4	2	1	2.5
1351	4	5	2	4	3	4	4	2	5	1	3	4	4	3	5	5	5	3	2	5	3.65
1352	5	2	2	1	3	5	3	4	1	2	3	5	2	4	1	3	3	4	4	1	2.9
1353	2	2	5	2	1	3	3	5	5	3	5	3	2	4	3	2	3	2	3	1	2.95
1354	3	3	3	1	5	1	2	2	1	2	3	4	5	3	2	2	2	2	1	2	2.45
1355	3	3	3	4	4	3	3	5	5	2	2	4	3	1	3	5	4	3	3	4	3.35
1356	3	2	3	1	2	2	3	3	2	1	2	3	1	2	4	5	3	3	2	5	2.6
1357	5	2	4	3	5	2	3	3	2	3	1	1	2	5	2	2	2	1	3	3	2.7
1358	4	5	2	3	1	2	3	3	3	2	4	5	2	4	2	5	3	3	3	1	3
1359	3	2	2	2	3	3	1	3	1	1	3	2	3	3	4	3	5	2	2	3	2.55
1360	1	2	2	2	2	1	1	1	3	3	2	2	1	2	4	3	1	2	2	4	2.05
1361	2	2	4	3	3	5	2	4	2	3	4	3	3	4	1	3	4	2	3	2	2.95
1362	1	1	1	2	1	1	2	2	2	3	1	1	1	2	1	4	2	4	2	2	1.8
1363	2	3	3	2	4	2	3	2	3	1	2	3	1	1	2	3	4	2	1	3	2.35
1364	2	1	1	2	1	1	2	2	2	3	2	2	4	1	2	2	2	2	1	1	1.8
1365	2	2	1	5	3	3	3	1	1	4	2	1	2	2	3	2	3	3	3	1	2.35
1366	2	2	5	2	2	2	2	4	3	2	2	1	3	2	2	1	4	1	2	2	2.3
1367	1	2	3	2	3	1	2	4	2	4	4	4	3	1	3	1	1	1	3	2	2.35
1368	4	3	1	3	3	5	3	2	3	4	4	4	4	3	3	5	2	5	3	4	3.4
1369	1	5	3	3	2	2	2	1	4	4	1	3	3	1	2	2	4	4	3	1	2.55
1370	4	5	5	2	3	5	3	3	5	1	5	4	2	3	2	2	5	3	3	5	3.5
1371	2	2	2	2	2	1	3	2	1	2	2	2	3	2	2	2	4	1	2	2	2.05
1372	2	3	1	1	4	2	2	3	3	2	2	5	3	2	4	2	2	2	3	3	2.55
1373	5	2	3	5	3	4	3	4	3	2	4	5	5	4	4	4	4	5	3	4	3.8
1374	2	1	1	1	4	2	2	1	1	3	3	1	3	2	1	3	2	2	2	1	1.9
1375	1	1	2	2	1	2	2	3	2	2	1	2	1	1	2	1	3	5	2	1	1.85
1376	3	1	3	3	4	1	2	1	2	4	3	3	2	3	2	1	3	1	4	1	2.35
1377	1	2	2	1	3	3	4	2	3	3	1	2	2	1	2	2	1	2	4	3	2.2
1378	3	3	2	2	2	1	1	4	2	3	3	1	3	2	2	3	5	3	1	2	2.4
1379	1	1	1	1	2	2	2	4	4	1	3	2	2	2	1	3	2	2	1	2	1.95
1380	2	1	1	1	1	3	1	4	2	1	1	1	2	2	1	2	2	2	1	2	1.65
1381	1	1	1	2	1	1	1	1	1	1	1	1	1	1	1	1	1	1	1	1	1.05
1382	1	1	1	1	1	1	2	1	1	1	3	2	3	1	1	1	2	2	2	2	1.5
1383	4	4	1	4	3	3	3	3	2	2	2	2	2	2	2	3	5	3	4	4	2.9
1384	3	5	2	5	3	5	5	2	3	3	4	5	5	5	4	5	4	4	5	5	4.1
1385	1	3	4	1	4	1	2	3	3	1	4	5	1	4	2	4	1	3	2	1	2.5
1386	4	3	2	2	4	3	2	2	4	2	1	5	2	2	2	4	2	3	1	4	2.7
1387	1	3	2	2	1	2	1	1	4	1	3	1	2	3	1	3	2	2	2	2	1.95
1388	4	3	5	3	2	5	5	3	4	5	3	3	5	2	3	5	3	4	2	2	3.55
1389	2	4	2	3	1	3	2	2	2	3	1	3	3	2	3	2	2	3	3	3	2.45
1390	5	1	2	1	4	3	4	2	4	3	5	1	3	4	3	1	5	2	3	1	2.85
1391	3	3	4	3	3	3	3	5	5	3	1	5	2	2	2	2	5	4	2	5	3.25
1392	2	3	5	4	5	2	4	2	3	3	3	4	3	2	3	4	2	3	5	2	3.2
1393	2	5	2	3	3	1	4	2	4	1	1	2	2	5	2	4	2	4	2	4	2.75
1394	2	1	2	1	1	2	5	3	2	2	5	2	1	3	1	1	2	1	2	2	2.05
1395	2	2	5	1	2	1	3	3	2	2	3	2	2	2	2	5	3	2	1	2	2.35
1396	5	5	1	4	5	4	2	3	3	3	4	4	5	5	5	5	3	3	5	2	3.8
1397	4	1	3	2	4	3	3	1	2	2	5	2	3	2	2	1	1	1	1	4	2.35
1398	4	3	1	1	5	1	3	1	2	3	1	2	4	2	2	2	1	1	2	2	2.15
1399	1	1	2	1	1	1	1	1	2	1	1	2	1	1	3	1	1	2	1	2	1.35
1400	1	1	1	1	2	3	2	5	3	4	3	1	3	4	2	1	3	3	5	3	2.55
1401	1	3	4	2	3	3	3	2	3	1	4	5	2	3	2	2	4	5	3	3	2.9
1402	2	3	3	5	3	3	4	1	2	3	2	4	1	2	4	1	2	1	2	2	2.5
1403	5	3	1	1	5	4	2	2	5	5	2	3	5	4	5	3	3	3	1	5	3.35
1404	2	2	2	4	3	2	3	1	1	2	3	4	4	5	2	4	1	1	5	3	2.7
1405	1	1	1	1	1	1	1	1	1	1	1	2	2	1	1	3	1	1	2	3	1.35
1406	2	2	2	1	1	1	2	3	1	1	1	1	2	2	5	1	1	1	4	2	1.8
1407	1	4	1	5	2	2	2	3	3	2	1	4	1	2	2	1	2	2	3	4	2.35
1408	2	4	4	2	3	4	3	3	4	1	4	2	3	2	4	3	3	4	1	3	2.95
1409	3	1	3	2	2	4	1	1	2	3	2	2	2	2	3	1	3	3	2	1	2.15
1410	2	1	3	2	2	2	2	3	3	2	2	3	1	1	4	2	2	1	2	3	2.15
1411	1	2	3	2	2	1	2	1	2	1	1	1	1	1	1	2	1	1	1	1	1.4
1412	3	1	3	1	3	5	3	2	2	5	2	3	2	3	4	2	3	2	2	2	2.65
1413	2	3	1	4	1	1	2	2	3	3	4	5	4	2	5	2	2	2	5	2	2.75
1414	2	1	1	1	2	2	1	2	2	1	1	1	1	2	1	1	3	1	2	1	1.45
1415	1	1	2	5	1	3	1	2	5	1	3	5	2	1	2	3	1	2	2	1	2.2
1416	1	3	2	1	2	1	1	2	2	2	1	2	3	3	1	3	3	2	1	3	1.95
1417	4	1	2	1	2	4	5	1	3	3	2	3	5	1	1	1	2	3	4	3	2.55
1418	2	3	2	2	4	4	1	2	4	1	2	2	2	2	2	4	4	4	2	1	2.5
1419	1	3	3	2	2	2	2	2	5	1	5	3	2	3	3	1	2	2	2	3	2.45
1420	5	5	4	4	4	4	5	5	5	4	5	4	2	5	1	4	2	2	4	5	3.95
1421	3	5	3	2	3	5	5	3	3	5	2	4	3	2	3	2	5	4	4	5	3.55
1422	2	2	3	4	1	2	3	4	4	2	1	1	3	1	1	3	1	2	2	2	2.2

## Sheet: Composites
ID	INSTITUTION	AGE	AGE_GROUP	DISCIPLINE	SMIS_TOTAL	CMNI_POW	CMNI_DOM	CMNI_VIO	IRMA_TOTAL	CMNI_POW_MEAN	CMNI_DOM_MEAN	CMNI_VIO_MEAN
1001	1	18	1	1	38	3	1	2	2.2	0.5	0.2	1
1002	2	18	1	2	46	8	6	3	1.85	1.333	1.2	1.5
1003	2	18	1	1	56	16	9	5	3.25	2.667	1.8	2.5
1004	2	18	1	4	24	7	3	1	1.75	1.167	0.6	0.5
1005	1	18	1	2	58	15	8	6	3.75	2.5	1.6	3
1006	1	18	2	2	50	12	7	5	3.05	2	1.4	2.5
1007	1	18	1	1	50	14	10	4	3.65	2.333	2	2
1008	2	18	1	3	44	17	8	7	3.3	2.833	1.6	3.5
1009	2	18	1	1	36	8	5	3	2.6	1.333	1	1.5
1010	2	19	2	4	37	10	10	7	3	1.667	2	3.5
1011	1	18	1	1	42	11	8	3	2.5	1.833	1.6	1.5
1012	2	18	1	1	27	10	7	3	3.15	1.667	1.4	1.5
1013	2	18	1	1	31	5	4	3	2.9	0.833	0.8	1.5
1014	1	18	2	2	38	13	8	4	3.15	2.167	1.6	2
1015	1	18	1	2	48	7	8	5	2.3	1.167	1.6	2.5
1016	1	18	2	1	46	13	8	4	2.45	2.167	1.6	2
1017	1	18	2	3	42	14	9	4	3.15	2.333	1.8	2
1018	2	18	1	2	16	10	2	1	1.4	1.667	0.4	0.5
1019	1	18	1	2	30	12	6	4	2.5	2	1.2	2
1020	1	19	3	2	46	12	5	5	2.4	2	1	2.5
1021	2	18	1	2	28	7	8	4	2.15	1.167	1.6	2
1022	1	18	1	2	39	9	10	5	2.85	1.5	2	2.5
1023	1	18	2	1	51	13	8	4	2.85	2.167	1.6	2
1024	1	22	3	1	42	13	8	5	2.8	2.167	1.6	2.5
1025	1	20	3	4	43	5	6	3	2.75	0.833	1.2	1.5
1026	2	18	2	4	16	13	6	5	1.9	2.167	1.2	2.5
1027	1	18	1	2	48	8	5	5	2.45	1.333	1	2.5
1028	1	18	1	1	44	14	9	5	3.1	2.333	1.8	2.5
1029	2	18	2	3	64	14	9	6	3.8	2.333	1.8	3
1030	1	18	1	2	53	14	7	6	2.45	2.333	1.4	3
1031	2	18	1	1	45	9	6	4	2.65	1.5	1.2	2
1032	1	20	3	1	46	16	10	5	3.45	2.667	2	2.5
1033	1	18	1	3	53	9	8	5	2.55	1.5	1.6	2.5
1034	2	18	1	3	54	12	8	4	2.9	2	1.6	2
1035	2	18	1	1	32	5	7	2	1.55	0.833	1.4	1
1036	2	18	1	1	23	6	2	3	2.4	1	0.4	1.5
1037	1	18	1	1	36	17	11	5	1.75	2.833	2.2	2.5
1038	1	18	1	3	63	10	4	4	3.75	1.667	0.8	2
1039	2	18	1	1	54	14	10	6	3.45	2.333	2	3
1040	1	18	1	1	45	12	7	3	2.5	2	1.4	1.5
1041	1	18	2	3	27	8	3	1	2.1	1.333	0.6	0.5
1042	1	18	1	1	55	15	6	3	3.4	2.5	1.2	1.5
1043	1	20	3	3	33	9	7	2	2.35	1.5	1.4	1
1044	2	18	1	1	30	7	5	1	2.3	1.167	1	0.5
1045	1	18	1	1	42	12	8	6	2.9	2	1.6	3
1046	2	19	2	1	38	11	8	4	2.6	1.833	1.6	2
1047	1	18	1	3	36	8	3	4	1.55	1.333	0.6	2
1048	2	21	3	4	36	8	7	3	3	1.333	1.4	1.5
1049	2	18	1	3	36	11	5	6	1.95	1.833	1	3
1050	1	21	3	2	45	13	9	4	2.8	2.167	1.8	2
1051	2	18	1	3	42	10	8	7	2.55	1.667	1.6	3.5
1052	2	18	2	1	30	9	10	3	3.3	1.5	2	1.5
1053	2	18	1	1	57	11	9	7	2.85	1.833	1.8	3.5
1054	2	21	3	4	40	9	4	2	1.6	1.5	0.8	1
1055	2	18	1	1	42	9	6	1	2.5	1.5	1.2	0.5
1056	2	18	1	1	50	6	6	4	1.8	1	1.2	2
1057	1	20	3	1	57	14	8	4	3.3	2.333	1.6	2
1058	1	18	1	1	43	13	6	4	1.9	2.167	1.2	2
1059	1	18	1	1	41	8	4	4	2.95	1.333	0.8	2
1060	1	18	2	2	47	8	5	5	2.6	1.333	1	2.5
1061	1	18	1	2	63	15	10	5	3.3	2.5	2	2.5
1062	1	18	1	4	41	13	9	4	2.05	2.167	1.8	2
1063	2	18	1	3	25	10	4	0	2.2	1.667	0.8	0
1064	1	21	3	2	64	14	11	6	3.25	2.333	2.2	3
1065	1	18	1	1	50	11	8	4	2.45	1.833	1.6	2
1066	2	18	1	2	51	12	6	4	2.3	2	1.2	2
1067	1	19	3	2	42	11	9	5	2.75	1.833	1.8	2.5
1068	2	19	2	1	49	16	10	5	2.5	2.667	2	2.5
1069	1	18	1	2	32	8	4	2	2.2	1.333	0.8	1
1070	2	18	1	2	47	11	8	4	1.7	1.833	1.6	2
1071	2	18	1	2	34	9	4	3	3.05	1.5	0.8	1.5
1072	1	18	1	2	53	12	10	5	2.85	2	2	2.5
1073	1	18	1	1	36	9	5	3	2.45	1.5	1	1.5
1074	2	18	1	4	42	12	10	6	2.1	2	2	3
1075	2	18	1	3	19	10	3	2	1.4	1.667	0.6	1
1076	2	18	1	1	26	10	7	3	1	1.667	1.4	1.5
1077	2	22	3	4	37	11	4	3	2.4	1.833	0.8	1.5
1078	1	21	3	2	47	12	6	5	2.65	2	1.2	2.5
1079	1	19	2	4	42	8	5	2	2.15	1.333	1	1
1080	1	18	1	3	57	9	4	5	2.5	1.5	0.8	2.5
1081	2	18	1	2	36	13	6	6	3.1	2.167	1.2	3
1082	2	19	2	1	38	17	8	5	3.15	2.833	1.6	2.5
1083	1	18	2	1	54	17	10	5	3.5	2.833	2	2.5
1084	1	18	1	2	36	16	9	4	3.05	2.667	1.8	2
1085	1	19	3	3	30	6	7	2	1.55	1	1.4	1
1086	1	18	2	1	47	15	10	6	2.75	2.5	2	3
1087	2	20	3	1	29	13	7	3	3.3	2.167	1.4	1.5
1088	2	19	2	3	47	13	12	5	3.4	2.167	2.4	2.5
1089	2	18	1	4	43	12	10	5	3.15	2	2	2.5
1090	1	18	1	2	52	11	6	2	1.55	1.833	1.2	1
1091	1	20	3	1	61	10	7	4	2.95	1.667	1.4	2
1092	2	19	2	1	49	15	7	4	3.1	2.5	1.4	2
1093	2	18	1	1	40	15	9	6	3.4	2.5	1.8	3
1094	2	18	1	4	53	13	6	4	2.5	2.167	1.2	2
1095	2	18	1	1	37	12	9	4	2.9	2	1.8	2
1096	1	18	2	2	57	14	12	7	2.45	2.333	2.4	3.5
1097	2	21	3	1	49	13	10	6	3	2.167	2	3
1098	1	18	1	2	31	8	4	2	2.45	1.333	0.8	1
1099	1	18	1	3	57	14	7	5	3.65	2.333	1.4	2.5
1100	1	18	1	3	37	10	6	2	2.7	1.667	1.2	1
1101	1	19	3	1	41	12	6	3	2.95	2	1.2	1.5
1102	2	18	2	1	39	15	8	5	3.4	2.5	1.6	2.5
1103	1	19	2	1	29	4	1	2	1.45	0.667	0.2	1
1104	1	18	1	4	65	13	9	7	4.15	2.167	1.8	3.5
1105	2	18	1	4	61	17	12	7	3.9	2.833	2.4	3.5
1106	1	18	1	2	37	8	5	2	2	1.333	1	1
1107	1	18	1	2	48	15	9	7	2.5	2.5	1.8	3.5
1108	2	19	2	3	40	8	2	2	2.1	1.333	0.4	1
1109	1	18	2	1	56	15	7	7	3.75	2.5	1.4	3.5
1110	1	22	3	4	47	11	5	3	3.15	1.833	1	1.5
1111	1	19	3	2	59	18	9	4	3.4	3	1.8	2
1112	1	18	1	2	26	9	5	2	1.35	1.5	1	1
1113	2	18	2	2	47	10	4	0	2.25	1.667	0.8	0
1114	2	20	3	1	58	18	10	5	3.6	3	2	2.5
1115	2	18	2	1	33	10	8	5	2.55	1.667	1.6	2.5
1116	2	18	1	3	40	8	4	2	2.4	1.333	0.8	1
1117	2	18	1	1	50	10	9	4	2.7	1.667	1.8	2
1118	1	18	1	2	35	3	5	3	1.8	0.5	1	1.5
1119	2	20	3	1	43	12	5	3	2.95	2	1	1.5
1120	2	18	1	2	31	10	3	3	2.25	1.667	0.6	1.5
1121	2	18	1	1	27	12	5	2	2.45	2	1	1
1122	2	18	2	2	52	9	7	4	3.05	1.5	1.4	2
1123	1	18	1	3	44	10	5	3	1.9	1.667	1	1.5
1124	1	18	1	1	16	8	6	0	1.4	1.333	1.2	0
1125	1	18	1	2	48	18	10	5	3.05	3	2	2.5
1126	1	18	2	2	54	11	6	3	2.15	1.833	1.2	1.5
1127	2	18	1	3	43	16	9	5	2.85	2.667	1.8	2.5
1128	2	18	2	4	28	11	6	3	3.85	1.833	1.2	1.5
1129	1	18	1	3	45	9	5	4	2.6	1.5	1	2
1130	1	18	2	1	29	12	5	5	3.1	2	1	2.5
1131	1	18	1	1	38	14	8	5	3.15	2.333	1.6	2.5
1132	1	18	1	1	34	8	7	3	2.1	1.333	1.4	1.5
1133	1	19	2	2	33	11	10	3	2.6	1.833	2	1.5
1134	1	18	1	1	55	13	9	3	3.15	2.167	1.8	1.5
1135	2	18	1	2	40	13	10	8	3.4	2.167	2	4
1136	1	18	1	2	45	12	7	4	2.55	2	1.4	2
1137	2	18	2	1	44	15	7	6	3.55	2.5	1.4	3
1138	2	18	1	3	41	4	3	3	2.05	0.667	0.6	1.5
1139	1	18	2	1	33	8	7	4	2.2	1.333	1.4	2
1140	2	18	1	1	39	9	4	5	2.25	1.5	0.8	2.5
1141	2	18	1	3	53	17	12	5	3.5	2.833	2.4	2.5
1142	1	18	1	2	42	8	6	2	2.95	1.333	1.2	1
1143	1	18	1	3	38	11	7	3	2.85	1.833	1.4	1.5
1144	1	18	1	2	38	13	5	3	3.6	2.167	1	1.5
1145	1	18	1	1	33	7	6	3	2.45	1.167	1.2	1.5
1146	1	18	1	3	46	13	10	5	2.9	2.167	2	2.5
1147	2	22	3	3	48	17	9	4	3.7	2.833	1.8	2
1148	1	18	1	3	41	4	6	2	2.05	0.667	1.2	1
1149	1	18	1	1	45	12	9	4	3.05	2	1.8	2
1150	1	18	2	2	40	13	9	3	3.2	2.167	1.8	1.5
1151	2	18	1	2	37	12	8	6	2.7	2	1.6	3
1152	1	18	1	1	39	10	6	4	1.65	1.667	1.2	2
1153	1	18	2	4	33	6	6	5	2.25	1	1.2	2.5
1154	1	21	3	1	40	11	9	3	2.75	1.833	1.8	1.5
1155	2	18	1	4	51	14	9	6	1.6	2.333	1.8	3
1156	1	21	3	2	48	10	3	3	3.2	1.667	0.6	1.5
1157	2	18	1	1	41	13	11	7	3.8	2.167	2.2	3.5
1158	2	18	1	2	49	12	5	3	2.15	2	1	1.5
1159	1	18	1	4	62	13	9	5	3.1	2.167	1.8	2.5
1160	2	19	3	3	57	11	8	3	2.15	1.833	1.6	1.5
1161	1	18	1	3	36	10	5	2	1.6	1.667	1	1
1162	2	18	1	3	41	6	6	3	1.5	1	1.2	1.5
1163	2	18	1	3	39	8	6	5	1.45	1.333	1.2	2.5
1164	2	18	1	3	43	10	8	4	2.25	1.667	1.6	2
1165	1	18	1	1	39	8	8	3	3.4	1.333	1.6	1.5
1166	2	18	1	2	41	9	3	0	1.3	1.5	0.6	0
1167	1	18	1	1	44	13	5	4	2.45	2.167	1	2
1168	1	18	1	4	43	16	11	5	2.65	2.667	2.2	2.5
1169	1	18	1	4	23	6	4	0	1.75	1	0.8	0
1170	2	18	1	1	43	10	5	3	2.75	1.667	1	1.5
1171	2	18	1	3	32	14	7	4	3	2.333	1.4	2
1172	1	18	1	4	44	14	9	4	3	2.333	1.8	2
1173	1	18	2	1	32	10	6	3	2.25	1.667	1.2	1.5
1174	1	18	1	2	25	7	5	2	1.45	1.167	1	1
1175	2	18	2	4	53	10	9	5	2.5	1.667	1.8	2.5
1176	1	18	1	1	58	10	9	6	2.5	1.667	1.8	3
1177	2	18	1	3	55	12	8	5	2.85	2	1.6	2.5
1178	1	18	1	1	49	14	5	5	2	2.333	1	2.5
1179	2	18	1	4	51	16	7	4	2.4	2.667	1.4	2
1180	1	18	1	4	40	10	8	5	3.4	1.667	1.6	2.5
1181	1	18	1	4	37	9	3	1	2.7	1.5	0.6	0.5
1182	1	18	1	2	57	9	6	3	2.8	1.5	1.2	1.5
1183	2	18	1	4	35	11	6	3	2.75	1.833	1.2	1.5
1184	2	18	1	3	42	10	6	3	2.3	1.667	1.2	1.5
1185	1	18	1	1	40	15	10	5	3.35	2.5	2	2.5
1186	2	18	1	3	39	14	9	4	3.1	2.333	1.8	2
1187	2	18	1	1	28	5	2	1	2.75	0.833	0.4	0.5
1188	2	18	2	2	62	16	11	3	2.95	2.667	2.2	1.5
1189	2	18	1	1	35	8	5	2	1.15	1.333	1	1
1190	1	19	2	1	49	9	7	6	2.2	1.5	1.4	3
1191	1	18	1	1	19	6	6	5	1.5	1	1.2	2.5
1192	2	18	1	3	46	10	7	7	1.95	1.667	1.4	3.5
1193	2	18	2	1	44	13	10	5	3.05	2.167	2	2.5
1194	2	22	3	3	38	11	6	4	2.4	1.833	1.2	2
1195	1	18	1	1	45	11	9	4	1.85	1.833	1.8	2
1196	1	18	1	1	53	10	6	3	3.3	1.667	1.2	1.5
1197	2	18	2	2	23	17	11	5	2.95	2.833	2.2	2.5
1198	2	19	2	3	45	13	9	5	2.95	2.167	1.8	2.5
1199	2	18	1	1	40	10	6	5	2.9	1.667	1.2	2.5
1200	2	18	1	2	16	9	5	2	1.85	1.5	1	1
1201	2	18	1	4	52	15	8	5	2.55	2.5	1.6	2.5
1202	1	18	1	2	30	7	6	4	2.55	1.167	1.2	2
1203	1	18	1	1	49	13	7	5	3.25	2.167	1.4	2.5
1204	2	18	1	1	49	15	10	6	3.7	2.5	2	3
1205	2	18	1	4	42	8	5	2	1.95	1.333	1	1
1206	1	18	2	1	41	8	5	0	2.3	1.333	1	0
1207	1	18	1	4	42	8	7	5	1.65	1.333	1.4	2.5
1208	2	18	1	2	35	7	3	3	2.05	1.167	0.6	1.5
1209	1	18	2	4	40	4	5	1	2.05	0.667	1	0.5
1210	1	18	2	3	44	15	6	0	2.75	2.5	1.2	0
1211	2	18	1	4	58	17	10	5	3.7	2.833	2	2.5
1212	2	18	1	2	33	11	7	5	3.95	1.833	1.4	2.5
1213	2	18	1	3	46	10	7	1	2.1	1.667	1.4	0.5
1214	1	18	1	2	38	9	6	2	2.9	1.5	1.2	1
1215	2	18	1	2	42	11	6	4	3	1.833	1.2	2
1216	1	18	1	2	34	8	5	1	1.65	1.333	1	0.5
1217	1	18	1	4	38	13	8	4	3.15	2.167	1.6	2
1218	2	18	1	4	41	12	7	4	2.35	2	1.4	2
1219	2	18	1	3	20	7	7	4	2.65	1.167	1.4	2
1220	2	18	1	2	53	13	8	4	2.75	2.167	1.6	2
1221	2	18	1	2	48	15	9	4	3	2.5	1.8	2
1222	2	18	1	3	47	7	1	1	1.45	1.167	0.2	0.5
1223	1	18	1	1	37	10	5	5	2.65	1.667	1	2.5
1224	1	18	2	1	45	13	6	5	2.75	2.167	1.2	2.5
1225	1	18	1	2	48	9	3	3	2.6	1.5	0.6	1.5
1226	1	19	2	1	34	7	7	2	3	1.167	1.4	1
1227	2	18	2	1	34	11	6	4	2.25	1.833	1.2	2
1228	1	18	1	1	41	11	5	4	2.25	1.833	1	2
1229	2	18	1	1	40	8	1	1	3.3	1.333	0.2	0.5
1230	2	18	1	1	49	12	7	4	3.05	2	1.4	2
1231	2	18	1	4	31	13	8	5	2.95	2.167	1.6	2.5
1232	1	18	2	2	42	13	9	4	2.5	2.167	1.8	2
1233	2	18	1	2	43	16	6	2	2.85	2.667	1.2	1
1234	1	18	1	3	42	11	8	4	3.45	1.833	1.6	2
1235	1	18	1	1	28	6	4	0	1.8	1	0.8	0
1236	2	18	1	4	57	13	9	3	2.65	2.167	1.8	1.5
1237	1	18	1	3	39	9	8	5	2	1.5	1.6	2.5
1238	1	18	1	1	44	13	10	7	2.45	2.167	2	3.5
1239	2	18	1	2	35	6	4	3	2.6	1	0.8	1.5
1240	1	22	3	4	41	10	7	2	3.5	1.667	1.4	1
1241	2	18	1	4	28	9	9	4	2.35	1.5	1.8	2
1242	2	18	1	2	39	10	9	1	3.25	1.667	1.8	0.5
1243	2	18	1	2	29	8	4	3	1.35	1.333	0.8	1.5
1244	1	18	1	1	46	18	7	5	2.75	3	1.4	2.5
1245	1	18	1	4	46	11	6	4	3.55	1.833	1.2	2
1246	2	18	1	1	40	13	5	2	2.8	2.167	1	1
1247	1	18	1	4	55	14	8	5	2.35	2.333	1.6	2.5
1248	2	18	1	3	47	14	8	4	3.05	2.333	1.6	2
1249	2	18	1	2	38	10	10	4	2.5	1.667	2	2
1250	2	18	2	2	36	12	7	3	3.2	2	1.4	1.5
1251	1	18	1	1	55	11	4	4	2.3	1.833	0.8	2
1252	1	18	1	1	49	6	7	2	2.7	1	1.4	1
1253	2	18	1	1	42	8	5	4	2.45	1.333	1	2
1254	1	20	3	1	47	18	7	7	3.25	3	1.4	3.5
1255	1	18	1	3	34	6	4	3	2	1	0.8	1.5
1256	2	18	1	2	56	9	6	2	2.7	1.5	1.2	1
1257	2	22	3	1	50	11	2	3	2.7	1.833	0.4	1.5
1258	2	18	2	4	46	15	7	5	3.45	2.5	1.4	2.5
1259	2	19	2	4	26	9	5	2	2.35	1.5	1	1
1260	1	18	1	4	38	8	6	1	1.65	1.333	1.2	0.5
1261	2	18	1	4	48	8	7	4	1.65	1.333	1.4	2
1262	2	18	2	1	36	13	6	3	2.8	2.167	1.2	1.5
1263	1	21	3	2	49	11	6	5	3.6	1.833	1.2	2.5
1264	2	18	1	3	51	12	6	3	3	2	1.2	1.5
1265	2	18	1	3	46	16	10	3	3.5	2.667	2	1.5
1266	2	18	1	1	33	8	6	5	4.05	1.333	1.2	2.5
1267	2	18	2	3	47	11	8	5	2.65	1.833	1.6	2.5
1268	2	18	1	1	58	14	10	6	3.35	2.333	2	3
1269	1	18	1	1	50	10	6	2	2.75	1.667	1.2	1
1270	1	18	1	2	49	13	11	5	3.4	2.167	2.2	2.5
1271	2	18	1	2	32	8	7	4	2.2	1.333	1.4	2
1272	2	18	1	2	41	6	4	3	2.55	1	0.8	1.5
1273	2	18	1	1	47	12	7	3	3	2	1.4	1.5
1274	2	18	1	4	46	13	7	1	3.2	2.167	1.4	0.5
1275	1	18	1	1	38	8	7	3	2.85	1.333	1.4	1.5
1276	1	18	1	1	48	14	6	5	3	2.333	1.2	2.5
1277	2	18	1	4	39	11	3	3	1.85	1.833	0.6	1.5
1278	2	18	1	4	30	4	6	2	2.75	0.667	1.2	1
1279	2	18	1	4	37	5	2	3	1.9	0.833	0.4	1.5
1280	2	18	1	3	37	11	7	5	3.4	1.833	1.4	2.5
1281	2	18	1	3	39	6	4	3	1.65	1	0.8	1.5
1282	1	18	1	2	33	11	6	3	2.05	1.833	1.2	1.5
1283	1	18	1	1	40	8	7	5	1.5	1.333	1.4	2.5
1284	1	22	3	2	34	5	3	2	1.15	0.833	0.6	1
1285	2	18	1	2	34	7	5	3	1.75	1.167	1	1.5
1286	1	18	2	1	44	9	6	5	3.3	1.5	1.2	2.5
1287	1	18	1	3	30	11	8	2	2.95	1.833	1.6	1
1288	2	18	2	2	56	10	5	5	2.8	1.667	1	2.5
1289	1	18	2	1	47	13	8	3	3.35	2.167	1.6	1.5
1290	2	18	1	1	53	12	8	2	3	2	1.6	1
1291	1	18	1	3	47	11	9	4	3.1	1.833	1.8	2
1292	1	18	1	1	33	9	6	3	2.15	1.5	1.2	1.5
1293	2	18	1	3	41	13	7	2	3.55	2.167	1.4	1
1294	1	20	3	2	54	9	8	3	2.8	1.5	1.6	1.5
1295	1	18	2	2	45	11	5	2	2	1.833	1	1
1296	2	20	3	2	35	9	5	4	3.15	1.5	1	2
1297	2	18	1	3	37	11	7	4	2.65	1.833	1.4	2
1298	1	18	2	2	49	13	6	5	3.3	2.167	1.2	2.5
1299	2	19	3	3	35	10	7	3	3	1.667	1.4	1.5
1300	1	18	1	2	63	12	5	4	3.25	2	1	2
1301	1	18	1	1	40	15	6	5	2.5	2.5	1.2	2.5
1302	2	18	2	4	57	18	9	5	3.8	3	1.8	2.5
1303	2	18	1	3	39	10	6	1	2.35	1.667	1.2	0.5
1304	2	18	2	3	36	8	8	2	2.8	1.333	1.6	1
1305	2	18	1	3	39	10	8	4	2.85	1.667	1.6	2
1306	2	18	2	4	51	11	6	2	2.2	1.833	1.2	1
1307	1	18	1	3	69	18	8	4	3.65	3	1.6	2
1308	1	18	1	3	47	13	7	4	3	2.167	1.4	2
1309	2	18	1	3	43	4	4	1	2.1	0.667	0.8	0.5
1310	1	18	2	3	69	16	9	7	3.7	2.667	1.8	3.5
1311	1	18	2	2	46	13	12	4	3.2	2.167	2.4	2
1312	1	18	1	3	34	11	5	2	2.25	1.833	1	1
1313	1	18	1	1	51	15	6	4	2.55	2.5	1.2	2
1314	2	18	2	4	31	8	5	6	2.6	1.333	1	3
1315	2	18	1	4	30	7	7	6	1.5	1.167	1.4	3
1316	2	19	2	1	25	14	8	3	2.85	2.333	1.6	1.5
1317	1	18	1	3	18	7	5	3	1.5	1.167	1	1.5
1318	1	18	1	1	43	8	6	2	2.15	1.333	1.2	1
1319	1	18	1	1	33	11	8	4	2.6	1.833	1.6	2
1320	1	18	1	3	29	8	5	6	1.75	1.333	1	3
1321	2	18	2	1	55	16	10	8	3.55	2.667	2	4
1322	2	18	1	3	46	11	9	6	2.55	1.833	1.8	3
1323	2	18	1	3	30	8	4	2	2.8	1.333	0.8	1
1324	1	18	2	2	38	10	6	4	1.35	1.667	1.2	2
1325	2	18	1	1	37	11	9	3	1.6	1.833	1.8	1.5
1326	2	18	1	1	48	10	4	2	2.35	1.667	0.8	1
1327	2	20	3	2	37	3	5	4	2.4	0.5	1	2
1328	2	18	1	4	32	9	6	4	2.65	1.5	1.2	2
1329	1	18	1	3	35	10	7	5	2.95	1.667	1.4	2.5
1330	1	22	3	1	49	12	10	5	2.55	2	2	2.5
1331	1	18	1	3	55	15	8	4	3.2	2.5	1.6	2
1332	2	18	1	2	46	12	8	6	3.45	2	1.6	3
1333	1	18	1	3	44	14	6	4	3.65	2.333	1.2	2
1334	1	18	2	1	40	8	4	1	1.75	1.333	0.8	0.5
1335	1	18	1	3	39	6	5	4	1.75	1	1	2
1336	1	18	1	2	56	14	11	5	3.5	2.333	2.2	2.5
1337	2	18	2	4	32	12	7	4	2	2	1.4	2
1338	2	19	2	2	34	11	5	4	1.75	1.833	1	2
1339	1	18	1	3	50	8	7	4	2.25	1.333	1.4	2
1340	1	18	1	4	47	12	7	3	1.65	2	1.4	1.5
1341	1	18	1	1	45	7	5	2	2.65	1.167	1	1
1342	1	18	2	4	39	9	8	4	2.7	1.5	1.6	2
1343	1	18	1	3	46	7	7	4	1.9	1.167	1.4	2
1344	1	18	1	1	40	10	6	4	3.3	1.667	1.2	2
1345	1	19	2	1	52	8	7	5	2.9	1.333	1.4	2.5
1346	2	18	2	3	52	18	12	7	3.9	3	2.4	3.5
1347	2	18	1	1	43	11	6	6	2.3	1.833	1.2	3
1348	1	19	2	2	56	14	6	5	1.85	2.333	1.2	2.5
1349	1	18	1	2	48	14	7	4	3.8	2.333	1.4	2
1350	2	18	2	2	37	7	8	6	2.5	1.167	1.6	3
1351	1	18	1	1	51	16	8	4	3.65	2.667	1.6	2
1352	2	18	1	4	57	15	7	7	2.9	2.5	1.4	3.5
1353	2	18	2	4	39	11	10	6	2.95	1.833	2	3
1354	1	18	1	4	46	12	8	1	2.45	2	1.6	0.5
1355	1	18	1	3	44	8	6	3	3.35	1.333	1.2	1.5
1356	2	18	2	1	56	12	7	4	2.6	2	1.4	2
1357	1	18	2	3	44	9	4	3	2.7	1.5	0.8	1.5
1358	2	18	1	1	35	12	6	4	3	2	1.2	2
1359	2	19	2	1	42	12	6	3	2.55	2	1.2	1.5
1360	2	18	1	1	35	9	3	2	2.05	1.5	0.6	1
1361	1	18	1	2	40	10	6	4	2.95	1.667	1.2	2
1362	2	18	1	3	36	6	3	1	1.8	1	0.6	0.5
1363	1	18	1	3	35	6	4	2	2.35	1	0.8	1
1364	2	22	3	2	37	9	4	2	1.8	1.5	0.8	1
1365	2	18	1	1	47	6	5	3	2.35	1	1	1.5
1366	1	18	1	4	66	16	8	5	2.3	2.667	1.6	2.5
1367	2	18	1	2	41	8	7	3	2.35	1.333	1.4	1.5
1368	2	22	3	2	36	15	8	7	3.4	2.5	1.6	3.5
1369	1	18	1	1	46	13	8	2	2.55	2.167	1.6	1
1370	1	18	1	3	50	12	5	3	3.5	2	1	1.5
1371	1	18	1	3	53	12	10	4	2.05	2	2	2
1372	1	18	1	1	34	14	7	4	2.55	2.333	1.4	2
1373	1	18	1	1	59	18	12	7	3.8	3	2.4	3.5
1374	2	18	2	3	28	13	5	3	1.9	2.167	1	1.5
1375	1	20	3	3	37	7	4	2	1.85	1.167	0.8	1
1376	1	18	1	1	50	9	7	5	2.35	1.5	1.4	2.5
1377	2	18	2	4	36	9	8	4	2.2	1.5	1.6	2
1378	1	21	3	1	46	8	7	4	2.4	1.333	1.4	2
1379	2	18	2	2	34	7	6	4	1.95	1.167	1.2	2
1380	1	18	1	4	46	5	4	2	1.65	0.833	0.8	1
1381	1	18	1	2	34	8	6	2	1.05	1.333	1.2	1
1382	2	18	1	3	23	6	5	0	1.5	1	1	0
1383	2	18	1	2	37	14	7	5	2.9	2.333	1.4	2.5
1384	2	18	2	1	23	10	6	4	4.1	1.667	1.2	2
1385	2	19	3	4	23	13	6	4	2.5	2.167	1.2	2
1386	2	19	3	2	38	9	6	1	2.7	1.5	1.2	0.5
1387	1	18	1	4	38	7	4	4	1.95	1.167	0.8	2
1388	1	18	1	1	45	9	8	5	3.55	1.5	1.6	2.5
1389	2	19	3	1	40	13	8	6	2.45	2.167	1.6	3
1390	2	19	2	1	49	11	7	4	2.85	1.833	1.4	2
1391	2	18	1	3	41	11	10	6	3.25	1.833	2	3
1392	1	21	3	2	38	8	7	4	3.2	1.333	1.4	2
1393	1	18	2	4	37	9	3	2	2.75	1.5	0.6	1
1394	2	18	1	2	38	12	7	4	2.05	2	1.4	2
1395	1	18	1	4	43	2	3	0	2.35	0.333	0.6	0
1396	2	18	1	1	49	13	11	4	3.8	2.167	2.2	2
1397	2	18	1	4	50	11	9	3	2.35	1.833	1.8	1.5
1398	1	18	1	3	37	8	4	4	2.15	1.333	0.8	2
1399	2	18	2	3	45	10	3	3	1.35	1.667	0.6	1.5
1400	2	18	1	3	41	7	9	5	2.55	1.167	1.8	2.5
1401	1	18	1	3	53	10	8	4	2.9	1.667	1.6	2
1402	2	18	1	2	53	15	9	3	2.5	2.5	1.8	1.5
1403	1	18	1	1	41	11	5	6	3.35	1.833	1	3
1404	2	21	3	1	47	12	7	3	2.7	2	1.4	1.5
1405	1	18	1	4	44	7	6	3	1.35	1.167	1.2	1.5
1406	2	18	1	2	34	8	9	4	1.8	1.333	1.8	2
1407	1	19	2	3	46	7	7	3	2.35	1.167	1.4	1.5
1408	1	18	1	2	54	9	4	2	2.95	1.5	0.8	1
1409	2	18	1	1	28	0	1	1	2.15	0	0.2	0.5
1410	1	18	1	1	38	9	8	1	2.15	1.5	1.6	0.5
1411	1	18	1	3	44	12	7	4	1.4	2	1.4	2
1412	2	18	1	2	36	11	5	3	2.65	1.833	1	1.5
1413	2	18	1	1	39	11	5	3	2.75	1.833	1	1.5
1414	2	18	1	2	43	9	7	4	1.45	1.5	1.4	2
1415	2	21	3	1	52	11	8	6	2.2	1.833	1.6	3
1416	1	18	1	2	36	9	4	5	1.95	1.5	0.8	2.5
1417	1	18	1	1	37	11	4	2	2.55	1.833	0.8	1
1418	1	18	1	3	39	10	5	1	2.5	1.667	1	0.5
1419	2	18	1	1	58	13	9	6	2.45	2.167	1.8	3
1420	2	18	2	2	57	14	12	5	3.95	2.333	2.4	2.5
1421	2	18	1	1	49	14	9	4	3.55	2.333	1.8	2
1422	2	19	3	1	43	5	2	1	2.2	0.833	0.4	0.5
